1           **Human ORC/MCM density is low in active genes and correlates with**  
2           **replication time but does not solely define replication initiation zones**

3

4 Short title: Genome-wide human ORC/MCM distribution

5

6 Authors: Nina Kirstein<sup>1</sup>, Alexander Buschle<sup>2</sup>, Xia Wu<sup>3</sup>, Stefan Krebs<sup>4</sup>, Helmut Blum<sup>4</sup>,  
7 Wolfgang Hammerschmidt<sup>2</sup>, Laurent Lacroix<sup>3</sup>, Olivier Hyrien<sup>3\*</sup>, Benjamin Audit<sup>5\*</sup>,  
8 Aloys Schepers<sup>1,6\*</sup>

9

10 Authors affiliations:

11 <sup>1</sup> Research Unit Gene Vectors, Helmholtz Zentrum München (GmbH), German  
12 Research Center for Environmental Health Marchioninistraße 25, 81377 Munich,  
13 Germany; N.K.: current address: University of Miami, Miller School of Medicine,  
14 Sylvester Comprehensive Cancer Center, Department of Human Genetics,  
15 Biomedical Research Building, 1501 NW 10<sup>th</sup> Avenue, Miami, FL 33136, USA

16 <sup>2</sup> Research Unit Gene Vectors, Helmholtz Zentrum München (GmbH), German  
17 Research Center for Environmental Health and German Center for Infection Research  
18 (DZIF), Partner site Munich, Germany

19 <sup>3</sup> Institut de Biologie de l'ENS (IBENS), Département de Biologie, Ecole Normale  
20 Supérieure, CNRS, Inserm, PSL Research University, F-75005 Paris, France;

21 X.W. current address: Zhongshan School of Medicine, Sun Yat-sen University, 74  
22 Zhongshan Er Road, Guangzhou, Guangdong Province, China, 510080.

23 <sup>4</sup> Laboratory for Functional Genome Analysis (LAFUGA), Gene Center of the  
24 Ludwig-Maximilians Universität (LMU) München, Feodor-Lynen-Str. 25, D-81377  
25 Munich, Germany

26 <sup>5</sup> Université de Lyon, ENS de Lyon, Univ Claude Bernard Lyon 1, CNRS,  
27 Laboratoire de Physique, F-69342, Lyon, France

28 <sup>6</sup> Current address: Monoclonal Antibody Core Facility, Helmholtz Zentrum München,  
29 German Research Center for Environmental Health, Ingolstädter Landstraße 1, D-  
30 85764 Neuherberg, Germany

31

32 Corresponding authors:

33 Aloys Schepers, Helmholtz Zentrum München, German Research Center for  
34 Environmental Health (GmbH), Monoclonal Antibody Core Facility, Ingolstädter  
35 Landstraße 1, D-85764 Neuherberg, Germany, +49 89 3187 1509,  
36 [schepers@helmholtz-muenchen.de](mailto:schepers@helmholtz-muenchen.de)

37 Benjamin Audit, Laboratoire de Physique, (UMR CNRS 5672), ENS de Lyon, 46  
38 allée d'Italie, F-69364, Lyon cedex 07, France, +33 4 2623 3852,  
39 [benjamin.audit@ens-lyon.fr](mailto:benjamin.audit@ens-lyon.fr)

40 Olivier Hyrien, Institut de Biologie de l'ENS (IBENS), Département de Biologie,  
41 Ecole Normale Supérieure, CNRS, Inserm, PSL Research University, F-75005 Paris,  
42 France, +33 1 44 32 39 20, [hyrien@biologie.ens.fr](mailto:hyrien@biologie.ens.fr)

43

44

45 Keywords: ORC, MCM complex, ChIP-seq, DNA replication, OK-seq, replication  
46 initiation, replication timing, transcription

47 **Abstract**

48 Eukaryotic DNA replication initiates during S phase from origins that have  
49 been licensed in the preceding G1 phase. Here, we compare ChIP-seq profiles of the  
50 licensing factors Orc2, Orc3, Mcm3, and Mcm7 with gene expression, replication  
51 timing and fork directionality profiles obtained by RNA-seq, Repli-seq and OK-seq.  
52 ORC and MCM are strongly and homogeneously depleted from transcribed genes,  
53 enriched at gene promoters, and more abundant in early- than in late-replicating  
54 domains. Surprisingly, after controlling these variables, no difference in ORC/MCM  
55 density is detected between initiation zones, termination zones, unidirectionally  
56 replicating and randomly replicating regions. Therefore, ORC/MCM density  
57 correlates with replication timing but does not solely regulate the probability of  
58 replication initiation. Interestingly, H4K20me3, a histone modification proposed to  
59 facilitate late origin licensing, was enriched in late replicating initiation zones and  
60 gene deserts of stochastic replication fork direction. We discuss potential mechanisms  
61 that specify when and where replication initiates in human cells.

62

## 63 INTRODUCTION

64 DNA replication ensures exact genome inheritance. In human cells, replication  
65 initiates from 20,000 – 50,000 replication origins selected from a 5-10 fold excess of  
66 potential or "licensed" origins (Moiseeva & Bakkenist, 2018; Papior et al., 2012).  
67 Origin licensing, also called pre-replicative complex (pre-RC) formation, occurs in  
68 late mitosis and during the G1 phase of the cell cycle, when CDK activity is low.  
69 During this step, the origin recognition complex (ORC) binds DNA and together with  
70 Cdt1 and Cdc6, loads minichromosome maintenance (MCM) complexes, the core  
71 motor of the replicative helicase, as inactive head-to-head double hexamers (MCM-  
72 DHs) around double-stranded DNA (Bell & Kaguni, 2013; Evrin et al., 2009; Remus  
73 & Diffley, 2009). A single ORC reiteratively loads multiple MCM-DHs, but once  
74 MCM-DHs have been assembled, neither ORC, nor Cdc6, nor Cdt1 are required for  
75 origin activation (Hyrien, 2016; Powell et al., 2015). During S phase, CDK2 and  
76 CDC7 kinase activities in conjunction with other origin firing factors convert some of  
77 the MCM-DHs into pairs of active CDC45-MCM-GINS helicases (CMG) that  
78 nucleate bidirectional replisome establishment (Douglas et al., 2018; Moiseeva &  
79 Bakkenist, 2018). MCM-DHs that do not initiate replication are dislodged from DNA  
80 during replication.

81 In the unicellular *S. cerevisiae*, replication origins are genetically defined by  
82 specific DNA sequences (Marahrens & Stillman, 1992). In multicellular organisms,  
83 no consensus element for origin activity has been identified and replication initiates  
84 from flexible locations. Although mammalian origins fire at different times  
85 throughout S phase, neighbouring origins tend to fire at comparable times, which  
86 partitions of the genome into ~5,000 replication timing domains (RTDs), (Rivera-  
87 Mulia & Gilbert, 2016a). RTDs replicate in a timely coordinated and reproducible

88 order from early to late in S phase (Pope et al., 2014; Zhao et al., 2017). Different,  
89 non-exclusive models exist for this temporal regulation. One model suggests that  
90 RTDs are first selected for initiation followed by stochastic origin firing within  
91 domains (Boulos et al., 2015; Pope et al., 2014; Rhind & Gilbert, 2013; Rivera-Mulia  
92 & Gilbert, 2016b). The cascade or domino model suggests that replication first  
93 initiates at the most efficient origins within RTDs and then spreads to less efficient  
94 origins (Boos & Ferreira, 2019; Guilbaud et al., 2011). Nuclear processes such as  
95 transcription have a major impact on replication profiles (Almeida et al., 2018; Chen  
96 et al., 2019; Martin et al., 2011). It is believed that flexible chromatin features  
97 including DNA and histone modifications and nucleosome dynamics contribute to  
98 origin specification (Cayrou et al., 2015; Prioleau & MacAlpine, 2016; O. K. Smith &  
99 Aladjem, 2014). For example, H4K20me3 has been proposed to support the licensing  
100 of a subset of late replicating origins in heterochromatin (Brustel et al., 2017).

101 Different approaches have been developed to characterize mammalian origins,  
102 at single-molecule level by optical methods or at cell-population level by sequencing  
103 purified replication intermediates (Hulke et al., 2020). Sequencing of short nascent  
104 strands (SNS-seq and INI-seq) identified initiation sites with high resolution,  
105 correlating with transcriptional start sites (TSSs) and CG-rich regions enriched in G-  
106 quadruplex motifs (G4s) and CpG-islands (Besnard et al., 2012; Cayrou et al., 2015;  
107 Langley et al., 2016; Prioleau & MacAlpine, 2016). Sequencing of replication-bubble  
108 containing restriction fragments (bubble-seq) identified origins enriched with DNase  
109 hypersensitive regions and the 5'-end but not the body of active transcription units  
110 (Mesner et al., 2013). INI-/SNS- and bubble-seq detected a higher origin density in  
111 early RTDs than in mid-to-late RTDs (Besnard et al., 2012; Langley et al., 2016;  
112 Mesner et al., 2013). Strand-oriented sequencing of Okazaki fragments (OK-seq)

113 revealed the population-averaged replication fork direction (RFD) allowing the  
114 mapping of initiation and termination events (Chen et al., 2019; McGuffee et al.,  
115 2013; Petryk et al., 2016; D. J. Smith & Whitehouse, 2012).

116 Consistently with bubble-seq (Mesner et al., 2013) and single molecule studies  
117 (Demczuk et al., 2012; Lebofsky et al., 2006), OK-seq studies of human cells (Petryk  
118 et al., 2016; Wu et al., 2018) demonstrated that replication initiates in broad but  
119 circumscribed initiation zones (IZs) consisting of multiple inefficient sites. OK-seq  
120 detected early-firing IZs precisely flanked on one or both sides by actively transcribed  
121 genes and late-firing IZs distantly located from active genes. Early IZs are separated  
122 from each other by short termination zones (TZs), which are enriched in transcribed  
123 genes. Late IZs are separated by very broad, gene-poor TZs (Chen et al., 2019; Petryk  
124 et al., 2016). OK-seq also identified unidirectionally replicating regions (URRs) that  
125 sometimes separate IZs from TZs, as well as extended regions of null replication fork  
126 directionality (NRRs) in gene deserts of uniformly late replication, consistent with  
127 temporally late and spatially random initiation and termination (Petryk et al., 2016).  
128 When comparing SNS-, bubble-, and OK-seq data, the highest concordance was  
129 observed between IZs detected by OK- and bubble-seq (Petryk et al., 2016). Recently,  
130 we found an excellent agreement between IZs determined by OK-seq and by EdUseq-  
131 HU, which identified newly synthesized DNA in cells synchronously entering S phase  
132 in the presence of EdU and hydroxyurea (Tubbs et al., 2018). Within the EdUseq-HU  
133 zones, the most efficient sites were associated with poly(dA:dT) tracts but not any of  
134 the GC-rich motifs found by SNS-seq (Tubbs et al., 2018). Repli-seq IZs, which are  
135 highly consistent with OK-seq IZs, were also recently identified in high-resolution  
136 replication timing (RT) profiles (Zhao et al., 2020).

137           Importantly, the number of IZs identified by OK-seq (5,000 - 10,000) (Petryk  
138 et al., 2016) only account for a fraction of the 20,000 - 50,000 initiation events  
139 estimated to take place in each S phase. This and replication kinetic considerations led  
140 us to postulate that following efficient initiation at "master initiation zones" (Ma-IZs)  
141 identified by OK-seq, replication proceeds by cascade activation of secondary zones,  
142 which are too dispersed and inefficient to leave an imprint on population-averaged  
143 profiles (Petryk et al., 2016). Consistently, single-molecule studies of yeast genome  
144 replication by nanopore-sequencing revealed that 10-20% of initiation events occur  
145 dispersedly and away from known, efficient origins, in a manner undetectable by cell  
146 population methods (Hennion et al., 2020; Muller et al., 2019).

147           Chromatin immunoprecipitation followed by sequencing (ChIP-seq) is a  
148 complementary method to map ORC and MCM chromatin binding. *Drosophila* ORC  
149 ChIP-seq suggests a stochastic binding pattern often correlating with open chromatin  
150 marks found at TSSs (MacAlpine et al., 2010). MCM ChIP-seq revealed that MCMs  
151 are initially loaded at ORC binding sites in absence of Cyclin E/CDK2 activity, but  
152 when Cyclin E/CDK2 activity rises in late G1, MCMs are more abundantly loaded  
153 and redistributed, resulting in a loss of spatial overlap with ORC together with MCM-  
154 DH displacement from actively transcribed genes (Powell et al., 2015). In human  
155 cells, ChIP-seq experiments with single ORC subunits led to the identification of  
156 13,000 to 52,000 potential ORC binding sites (Dellino et al., 2013; Miotto et al.,  
157 2016). In a previous study, we used the Epstein-Barr virus (EBV) as model system to  
158 compare ORC binding and replication initiation. During latency, replication of the  
159 EBV genome is entirely dependent on the human replication initiation machinery. A  
160 5-10-fold excess of potential origins are licensed per genome with respect to 1-3  
161 initiation event(s) mapped (Norio & Schildkraut, 2001, 2004; Papior et al., 2012). A

162 recent genome-wide Mcm7 binding study in human HeLa cells proposed that MCM-  
163 DHs bind in excess regardless of the chromatin environment, but that origin activation  
164 preferentially occurs upstream of active TSSs (Sugimoto et al., 2018).

165 Here, we present the first comparative survey of four different pre-RC  
166 components and replication initiation events in the human genome by combining  
167 ChIP-seq and OK-seq analyses in the lymphoblastoid Raji cell line. We perform ORC  
168 and MCM ChIP-seq in cell cycle synchronized pre-replicative (G1) chromatin, to  
169 obtain a comprehensive picture of ORC/MCM behavior before replication. We find  
170 ORCs and MCMs broadly distributed over the genome, where ORC density highly  
171 correlates with early replication timing, an effect less prominently observed for  
172 MCMs. We observe that active transcription locally influences ORC and MCM  
173 distribution. ORC/MCM are displaced from actively transcribed gene bodies and  
174 enriched at active gene promoters. ORC/MCM density is homogeneous over non-  
175 transcribed genes and intergenic regions of comparable RT. Consequently, MCM  
176 depletion characterizes genic borders of early IZs but not of other IZ borders.  
177 Furthermore, URRs, which are refractory to replication initiation, show a similar  
178 ORC/MCM density as IZs and TZs. NRRs do not show higher ORC/MCM densities  
179 than IZs, TZs and URRs. These findings suggest that ORC/MCM densities do not  
180 solely determine IZs and that a specific contribution of the local chromatin  
181 environment is required. Indeed, we previously showed that IZs are enriched in open  
182 chromatin marks typical of active or poised enhancers (Petryk et al., 2016). Here, we  
183 further show that a subset of non-genic late IZs are enriched in H4K20me3,  
184 confirming our previous finding that H4K20me3 enhances origin activity in certain  
185 chromatin environments (Brustel et al., 2017; Shoaib et al., 2018).



186           Our findings support the cascade model for replication initiation: although, on  
187 average, the entire genome (except transcribed genes) is licensed for replication  
188 initiation, adjacent active transcription and internal epigenetic marks specify the  
189 extent of Ma-IZs, from which diverging forks emanate before secondary origin  
190 activation takes place.

191 **Results**

192 MODERATE AVERAGING IS THE BEST APPROACH FOR ORC AND MCM-DH  
193 DISTRIBUTION ANALYSIS

194 To obtain a complete picture of ORC and MCM distributions prior to  
195 replication initiation, we cell-cycle fractionated human lymphoblastoid Raji cells by  
196 centrifugal elutriation into a pre-replicative G1 population, which is enriched for  
197 ORC/MCM bound chromatin (Papior et al., 2012). Propidium Iodide staining fol-  
198 lowed by FACS (Suppl. Fig. 1a) and Western blot analyses of cyclins A, B, and  
199 H3S10 phosphorylation (Suppl. Fig. 1b) confirmed the cell cycle stages. To ensure  
200 unbiased detection of ORC and MCM positions by ChIP-seq, we simultaneously  
201 targeted two members of both complexes: Orc2, Orc3, Mcm3 and Mcm7, using  
202 validated ChIP-grade antibodies (validated in: Papior et al., 2012; Ritzi et al., 2003;  
203 Schepers et al., 2001). ChIP efficiency and quality were measured using the Epstein-  
204 Barr virus latent origin *oriP* as reference (Suppl. Fig. 1c). The Raji cell line contains  
205 50-60 EBV episomes (Adams et al., 1973). The viral protein EBNA1 recruits ORC to  
206 *oriP*'s dyad symmetry element, followed by MCM-DH loading. We detected both  
207 ORC and MCM at the dyad symmetry element, as expected (Papior et al., 2012; Ritzi  
208 et al., 2003).

209 ChIP-sequencing of two ORC (Orc2, Orc3) and three MCM (Mcm3, Mcm7)  
210 replicates resulted in reproducible, but dispersed ChIP-seq signals as exemplified at  
211 the well-characterized replication origin Mcm4/PRKDC (Fig. 1a). We first employed  
212 the MACS2 peak-calling program (Feng et al., 2012; Zhang et al., 2008), but found  
213 that the obtained results were too dependent on the chosen program settings. At  
214 genome-wide levels, we found that ORC and MCM distributions were too dispersed

215 to be efficiently captured by peak calling (data not shown), requiring an alternative  
216 approach.

217         Consequently, we summed up the reads of the ChIP replicates in 1 kb bins and  
218 normalized the signals against the mean read frequencies of each ChIP sample and  
219 against input, as is standard in most ChIP-seq analyses. However, in line with a  
220 previous report (Teytelman et al., 2009), the input sequencing control was  
221 differentially represented in DNase HS regions or regions of biological function. For  
222 example, the input was significantly underrepresented in DNase HS regions (DNase  
223 HS clusters retrieved from an ENCODE dataset comprising 125 cell lines, see  
224 Material and Methods section; Suppl. Fig. 2a), TSSs (Suppl. Fig. 2b), and early RTDs  
225 (Suppl. Fig. 2c). As sonication-hypersensitive regions correlate with DNase HS  
226 regions (Schwartz et al., 2005), we carefully compared our input-normalized approach  
227 versus no input normalization: some quantitative but no qualitative changes were  
228 observed. We have included figures showing non-normalized data in the Supplement.  
229 Furthermore, the 1 kb bin size was large enough to average out stochastic variations  
230 of ORC/MCM, but small enough to detect significant local changes. For example,  
231 ORC/MCM enrichments at the Mcm4/PRKDC origin were detected after binning  
232 (Fig. 1b, Suppl. Fig. 3a without input division). The relative read frequencies of  
233 Orc2/Orc3 (Fig. 1c, Suppl. Fig. 3b without input division) and Mcm3/Mcm7 (Fig. 1d,  
234 Suppl. Fig. 3c) showed high Pearson correlation coefficients of  $r = 0.866$  and  $r =$   
235  $0.879$ , respectively. The correlations between ORC and MCM were only slightly  
236 lower (Mcm3/Orc2/3:  $r = 0.775/0.757$ , Mcm7/Orc2/3:  $r = 0.821/0.800$ , Fig. 1e, Suppl.  
237 Fig. 3d). Hierarchical clustering based on Pearson correlation distance between ChIP  
238 profiles showed that ORC and MCM profiles clustered together. We conclude that  
239 this binning approach is valid for analyzing our ChIP-seq data.

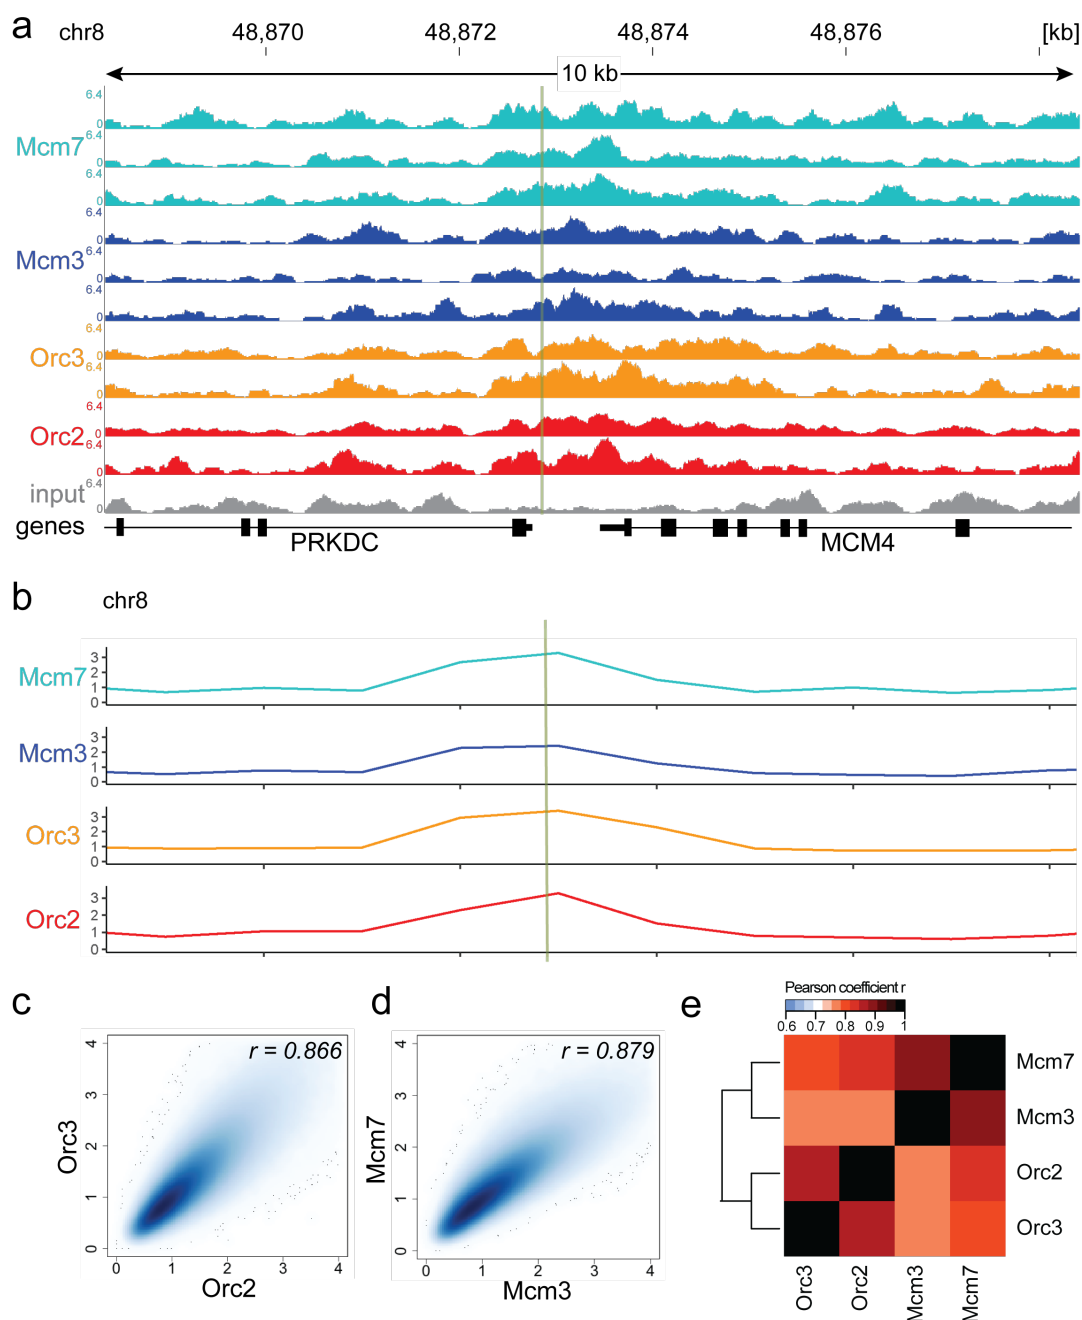

240

241 Figure 1: ORC/MCM ChIP-seq is best analyzed using a moderate averaging approach.  
 242 a) Sequencing profile visualization in UCSC Genome Browser (hg19) at the Mcm4/PRKDC  
 243 origin after RPGC normalization: two samples of Orc2, Orc3 and three samples of Mcm3,  
 244 Mcm7, plotted against the input. The profiles are shown in a 10 kb window (chr8: 48,868,314  
 245 - 48,878,313), the position of the origin is indicated as green line. b) The profile of  
 246 ORC/MCM ChIP-seq after 1 kb binning at the same locus. The reads of replicates were  
 247 summed and normalized by the total genome-wide ChIP read frequency followed by input  
 248 division. Y-axis represents the resulting relative read frequency. c) Correlation plot between  
 249 Orc2 and Orc3 relative read frequencies in 1 kb bins. d) Correlation plot between Mcm3 and  
 250 Mcm7 relative read frequencies in 1 kb bins. e) Heatmap of Pearson correlation coefficients  $r$   
 251 between all ChIP relative read frequencies in 1 kb bins. Column and line order were

252 determined by complete linkage hierarchical clustering using the correlation distance ( $d = 1 -$   
253  $r$ ).

254 Miotto et al. (2016) demonstrated that Orc2 positions highly depend on  
255 chromatin accessibility and colocalize with DNase hypersensitive (HS) sites present  
256 at active promoters and enhancers. Furthermore, Sugimoto et al. (2018) observed that  
257 active origins, enriched with Mcm7 correlate with open chromatin sites. We indeed  
258 found a significant enrichment of ORC/ MCM at DNase HS regions larger than 1 kb,  
259 compared to regions deprived of DNase HS sites (Suppl. Fig. 3e), which further  
260 validated our data.

261

262 ORC/MCM ARE ENRICHED IN INITIATION ZONES DEPENDENT ON TRANSCRIPTION

263 After confirming the validity of the ChIP experiments and establishing an  
264 analysis approach based on moderate averaging, we compared the relative read  
265 frequencies of ORC/MCM to active replication initiation units. Using OK-seq in Raji  
266 cells (Wu et al., 2018), we calculated the RFD (see methods), and delineated zones of  
267 preferential replication initiation as ascending segments (AS) of the RFD profile. OK-  
268 seq detects RFD upshifts that define origins to kb resolution in yeast (McGuffee et al.,  
269 2013), but in mammalian cells these transitions are more gradual, extending over 10-  
270 100 kb (Chen et al., 2019; McGuffee et al., 2013; Petryk et al., 2016; Tubbs et al.,  
271 2018; Wu et al., 2018). To assess ChIP signals within AS, we only kept ASs  $> 20$  kb.  
272 Using the RFD shift across the ASs ( $\Delta$ RFD) as a measure of replication initiation  
273 efficiency, we further required  $\Delta$ RFD  $> 0.5$  to make sure ASs corresponded to  
274 efficient IZs. In total, we selected 2,957 ASs, with an average size of 52.3 kb, which  
275 covered 4.9% (155 Mb) of the genome (Fig. 2a, green bars, Table 1). 2,451 (83%) of  
276 all AS located close to genic regions (ASs extended by 20 kb on both sides

277 overlapped with at least one annotated gene). 673 ASs (22.8% of all AS) were flanked  
278 by actively transcribed genes (TPM > 3; TPM: transcript per million) on both sides  
279 (type 1 AS) with less than 20 kb between AS borders and the closest transcribed gene.  
280 1,026 ASs (34.7%) had only one border associated to a transcribed gene with TPM >  
281 3 (type 2 AS). 506 ASs (17.1%) were devoid of proximal genes (non-genic AS),  
282 where 20 kb extended ASs did not overlap with any annotated gene (Table 1).  
283 Although the slope did not change considerably in the different AS types, type 1 ASs  
284 were on average the most efficient, while non-genic ASs were slightly less efficient  
285 (Suppl. Fig. 4a). Furthermore, type 1 and type 2 ASs located to early replication  
286 timing domains, while non-genic AS were predominantly late replicating (Suppl. Fig.  
287 4b), which is in agreement with IZ previously described for GM06990 and HeLa  
288 (Petryk et al., 2016).

289 Table 1: Characterization of different AS subtypes.

290 Only AS  $\geq 20$ kb with  $\Delta$ RFD > 0.5 were considered. Genic ASs: ASs extended 20 kb on both  
291 sides is overlapped by genic region(s) irrespective of transcriptional activity. Type 1 and type  
292 2 AS: AS flanked by expressed genes (TPM  $\geq 3$ ) within 20kb on both sides (type 1) or one  
293 side (type 2). Non-genic: no annotated gene  $\pm 20$ kb of AS border.

|              | Number | Genome<br>coverage [%] | Average<br>length [kb] |
|--------------|--------|------------------------|------------------------|
| All AS       | 2,957  | 4.9                    | 52.3                   |
| Genic AS     | 2,451  | 4.1                    | 52.3                   |
| Type 1 AS    | 673    | 1.1                    | 50.7                   |
| Type 2 AS    | 1,026  | 5.2                    | 50.2                   |
| Non-genic AS | 506    | 0.8                    | 50.7                   |

294 Replication can only be activated when functional pre-RCs are established in  
295 the preceding G1 phase. We set our ORC/MCM ChIP-seq signals in relation to RFD  
296 and computed the relative read frequencies of ORC/MCM around all AS aggregate

297 borders. Both ORC and MCM were enriched within ASs compared to flanking  
298 regions (Fig. 2b, Suppl. Fig. 5a without input division).

299 To resolve the impact of transcriptional activity, we repeated this calculation  
300 and sorted for type 1 ASs (Fig. 2c, Suppl. Fig. 5b), type 2 ASs (Fig. 2d, Suppl. Fig.  
301 5c), and non-genic ASs (Fig. 2e, Suppl. Fig. 5d). Transcriptional activity in AS  
302 flanking regions was associated with increased ORC/MCM levels inside ASs  
303 (comparing Fig. 2b and Fig. 2c) and a prominent depletion of MCMs from transcribed  
304 regions (Fig. 2c and 2d). In contrast, in type 2 ASs, ORC/MCM levels remained  
305 elevated at non-transcribed AS borders (Fig. 2d, left border). No evident ORC/MCM  
306 enrichments were detected within non-genic ASs (Fig. 2e).

307 AS borders associated with transcriptional activity were locally enriched in  
308 ORC/MCM (Fig. 2c and 2d (right border)). This is in line with previously detected  
309 Orc1 accumulation at IZ borders (Petryk et al., 2016). Reciprocally, non-genic AS  
310 borders showed a local dip in ORC/MCM levels (Fig. 2d (left border) and 2e), but the  
311 biological significance of these observations is unclear. A sequence analysis revealed  
312 biased distributions of homopolymeric repeat sequences at AS borders (data not  
313 shown). Such sequences may affect nucleosome formation and ORC binding, but may  
314 also bias Okazaki fragment detection, hence border detection, at small scales, which  
315 explains the local RFD peaks observed at AS borders (Suppl. Fig. 4a).

316

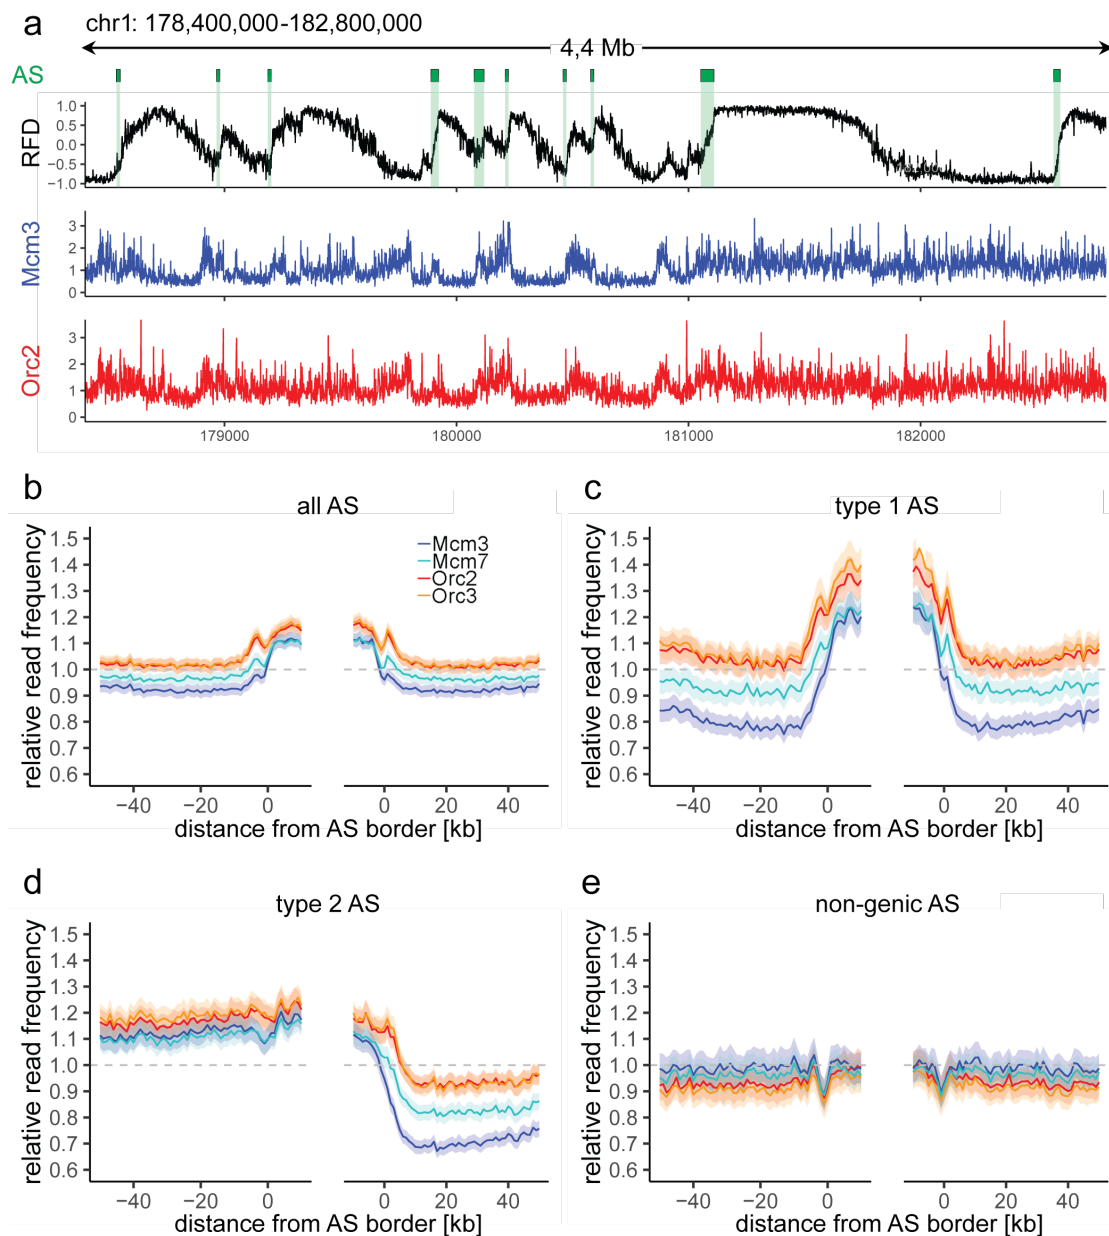

317

318 Figure 2: ORC/MCM enrichment within AS depends on active transcription. a) Top panel:  
319 Example of an RFD profile on chr1: 178,400,000 – 182,800,000, covering 4 Mb. Detected  
320 ASs are labeled by green rectangles. Middle and bottom panel: Representative Mcm3 (blue)  
321 and Orc2 (red) ChIP-seq profiles after binning for the same region. b-e) Average input-  
322 normalized relative ChIP read frequencies of Orc2, Orc3, Mcm3, and Mcm7 at AS borders of  
323 b) all AS (n = 2957), c) type 1 ASs with transcribed genes at both AS borders (n = 673), d)  
324 type 2 ASs oriented with their AS border associated to a transcribed genes at the right (n =  
325 1026), and e) non-genic ASs in gene deprived regions (n = 506). The mean of ORC and  
326 MCM relative read frequencies are shown  $\pm 2 \times$  SEM (lighter shadows). The dashed grey  
327 horizontal line indicates relative read frequency 1.0 for reference.

328



329 ORC AND MCM ARE DEPLETED FROM TRANSCRIBED GENE BODIES AND ENRICHED  
330 AT TSSs

331 Replication initiation and termination often correlate with active gene transcription  
332 (Besnard et al., 2012; Cayrou et al., 2015; Cayrou et al., 2011; Picard et al., 2014).  
333 Consistent with previous OK-seq studies (Chen et al., 2019; Petryk et al., 2016), we  
334 find on average a strong ascending RFD signal upstream of TSSs and downstream of  
335 TSSs of active genes, and a negative RFD slope across the active gene bodies (Suppl.  
336 Fig. 6a). This behavior depends on transcriptional activity, as silent genes display an  
337 overall flat RFD profile (Suppl. Fig. 6a). The ORC/MCM enrichment in type 1 and 2  
338 ASs compared to flanking genic regions (Fig. 2c and d) argues for a major  
339 contribution of active transcription to ORC/MCM positioning. To study this, we set  
340 our ChIP-seq data in relation to transcription profiles obtained from asynchronously  
341 cycling Raji cells. We analyzed ORC/MCM relative read frequencies around active  
342 TSSs and transcriptional termination sites (TTSs) (Fig. 3, Suppl. Fig. 6b-e without  
343 input normalization). ORC relative read distribution of G1-phased cells was  
344 significantly enriched at active TSSs as already demonstrated in *Drosophila*  
345 (MacAlpine et al., 2010) and human cells (Dellino et al., 2013; Miotto et al., 2016).  
346 ORC levels were located moderately but significantly higher upstream of TSSs and  
347 downstream of TTSs than within active genes (Fig. 3a, Suppl. Fig. 6b). The depletion  
348 of ORC from gene bodies was statistically significant for approximately 45% of  
349 actively transcribed genes (Suppl. Table 1). Compared to ORC, Mcm3 and Mcm7  
350 enrichments at TSSs were less prominent, but depletion from gene bodies was more  
351 pronounced (Fig. 3a, Suppl. Fig. 6b), with 75% and 58% of investigated transcribed  
352 gene bodies significantly depleted from Mcm3 and Mcm7, respectively (Suppl. Table  
353 1).

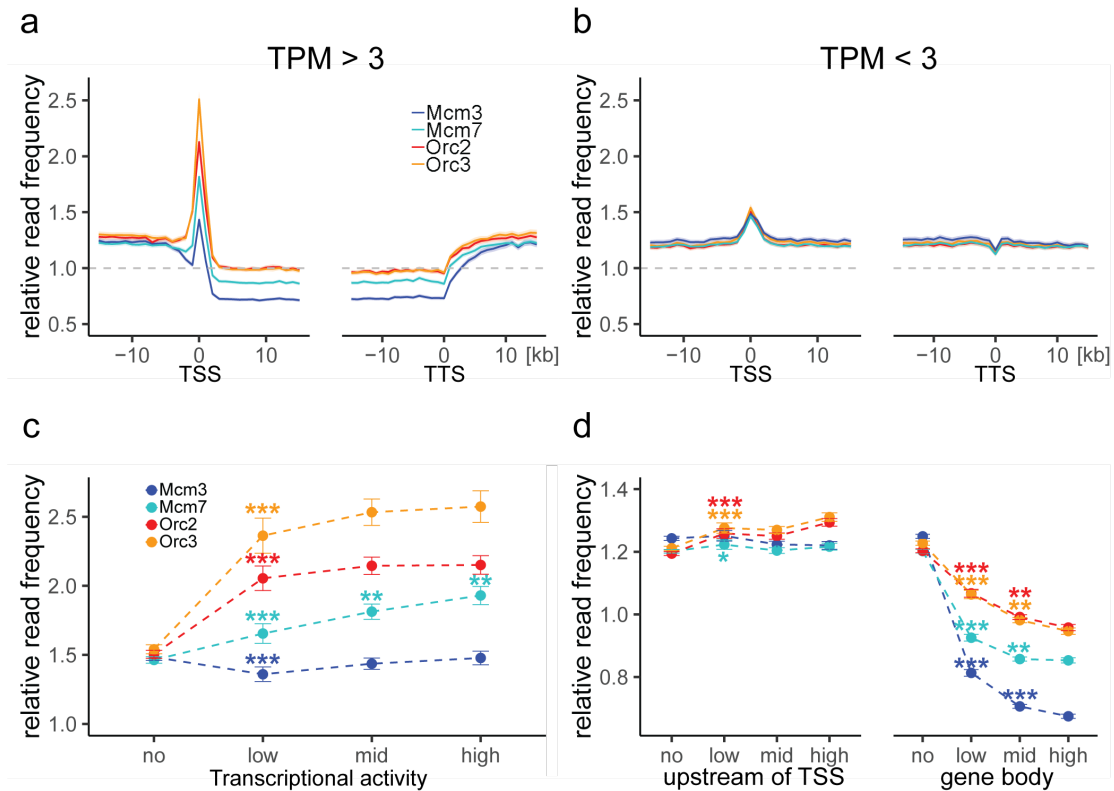

354

355 Figure 3: ORC is enriched at active TSSs while MCM is depleted from actively transcribed  
 356 genes. a) - b) ORC/MCM relative read frequencies around TSSs or TTSs for a) active genes  
 357 (TPM > 3) and b) inactive genes (TPM < 3). Only genes larger than 30 kb without any  
 358 adjacent gene within 15 kb were considered. Distances from TSSs or TTSs are indicated in  
 359 kb. Means of ORC and MCM frequencies are shown  $\pm 2 \times$  SEM (lighter shadows). The  
 360 dashed grey horizontal line indicates relative read frequency 1.0 for reference. c) ORC/MCM  
 361 relative read frequencies at TSSs dependent on transcriptional activity ( $\pm 2 \times$  SEM). d)  
 362 ORC/MCM relative read frequencies upstream of TSSs and within the gene body dependent  
 363 on transcriptional activity ( $\pm 2 \times$  SEM; TSSs  $\pm 3$  kb removed from analysis). Transcriptional  
 364 activity was classified as: no (TPM < 3), low (TPM 3-10), mid (TPM 10-40), high (TPM >  
 365 40). Statistics were performed by one-way ANOVA followed by Tukey's post-hoc test. P-  
 366 values are indicated always comparing to the previous transcriptional level. \*  $p < 0.05$ , \*\*  $p <$   
 367  $0.01$ , \*\*\*  $p < 0.001$ .

368 Depletion was strictly homogeneous from TSS to TTS, strongly suggesting that  
 369 transcription itself displaces ORC and MCM-DH complexes (Fig. 3a). In contrast, at  
 370 silent genes, ORC/MCM were hardly enriched at TSSs and were not depleted from  
 371 gene bodies (Fig. 3b, Suppl. Fig. 6c without input-correction). This confirms that  
 372 active transcription is required for TSS enrichment and gene body depletion of  
 373 ORC/MCM. Nevertheless, we also observed that increasing transcriptional activity

374 (classified as follows: low: 3-10 TPM, mid: 10-40 TPM, high: > 40 TPM) did not  
375 have any major impact on ORC/MCM enrichments at TSSs (Fig. 3c, Suppl. Fig. 6d  
376 without input-correction). ORC/MCM depletion within gene bodies slightly increased  
377 with transcription levels (Fig. 3d), but this was less convincing in the non-input-  
378 normalized data (Suppl. Fig. 6e). Basal ORC/MCM levels upstream of TSSs and  
379 downstream of TSSs were identical, indicating that the local ORC enrichment at TSSs  
380 does not result in more MCM loading upstream than downstream of active genes.

381 Pre-replicative chromatin represents a cell cycle stage immediately prior to  
382 replication initiation, with an excess of MCM-DH loaded onto chromatin (Powell et  
383 al., 2015; Takahashi et al., 2005). Our observation that Mcm3 and Mcm7 are  
384 significantly depleted from gene bodies is consistent with their active displacement by  
385 transcription, as previously proposed in *Drosophila* (Powell et al., 2015).

386

387 ORC/MCM GENOMIC DISTRIBUTION IS BROAD AND CORRELATED WITH  
388 REPLICATION TIMING BUT NOT INITIATION ZONES

389 In the previous sections, we observed a striking influence of transcriptional  
390 activity on ORC/MCM distribution that contributes to circumscribing IZs. However,  
391 transcriptionally active regions only account for a small subset of the genome.  
392 Instead, at non-genic AS, a rather homogenous ORC/MCM pattern within and outside  
393 AS is visible (Fig. 2e, Suppl. Fig. 5d without input-correction).

394 Replication timing (RT) is a crucial aspect of genome stability that has been  
395 strongly correlated with gene expression and chromatin structure. RT is determined  
396 by the timing of origin firing. In yeast, it has been proposed that the number of MCM-  
397 DHs loaded at origins correlates with RT, suggesting how RT profiles can emerge  
398 from stochastic origin firing (Das et al., 2015; Yang et al., 2010). In yeast, however,

399 MCM-DHs are only detectable at origins, whereas in human cells ORC/MCM are  
400 broadly distributed within and outside IZs so that the presence of ORC/MCM does  
401 not solely define RT.

402 To clarify the relationships between IZ location, IZ firing time and  
403 ORC/MCM density in human cells, we used Raji Early/Late Repli-seq data from  
404 Sima *et al.* (Sima *et al.*, 2019) and related RT to ORC/MCM relative read frequencies  
405 and RFD slope. Thus, we analyzed i) ascending RFD segments (ASs), corresponding  
406 to IZs, ii) descending RFD segments (DSs), determined symmetrically to ASs and  
407 representing predominant replication termination, iii) unidirectional replicating  
408 regions (URRs; segments were  $|RFD| > 0.8$  over  $> 300$  kb), and iv) regions of null  
409 RFD i.e. bidirectional replication (NRRs; segments were  $|RFD| < 0.15$  over  $> 500$  kb).  
410 Example representations of these four categories are depicted in Suppl. Fig. 7a and  
411 7b. In Fig. 4 we calculated relative Orc2 and Mcm3 (see Suppl. Fig. 7 d-e for Orc3  
412 and Mcm7) read frequencies in 10 kb bins against RT in intergenic regions (left  
413 column), silent (TPM  $< 3$ ) genes (middle column), and active (TPM  $> 3$ ) genes (right  
414 column), while considering either all bins (top row) or bins corresponding to ASs,  
415 DSs, URRs, and NRRs (following rows in descending order). CHIP frequencies are  
416 normalized by column, i.e. each column is the probability density function of CHIP  
417 frequency at a given RT bin. Intergenic regions (left column of each panel) show an  
418 ORC/MCM distribution mostly independent from RFD slope, but depending on RT,  
419 with higher ORC and MCM levels in early RTDs.

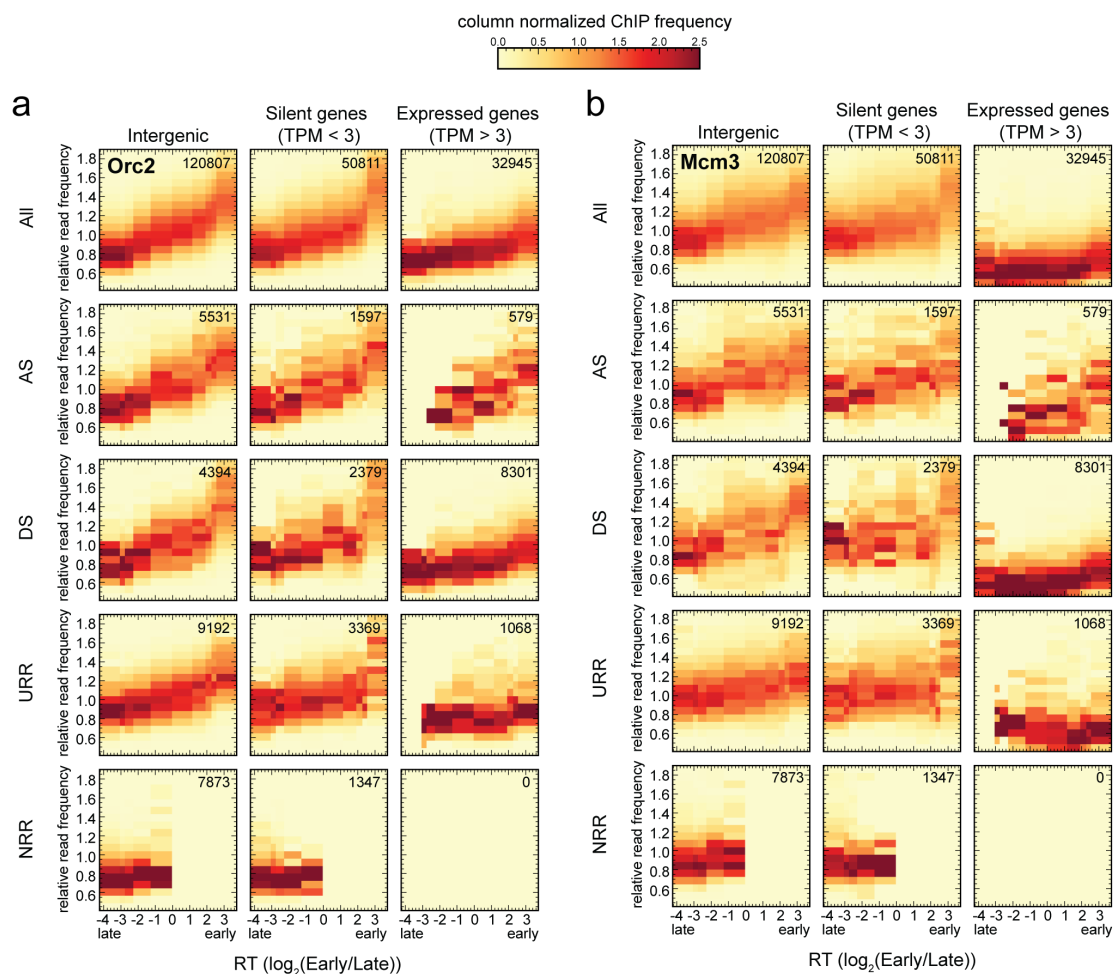

420

421 Figure 4: ORC/MCM levels correlate with RT and transcriptional activity but are otherwise  
 422 homogeneously distributed along the genome and uncorrelated to RFD patterns (see also  
 423 Suppl. Fig. 7). a-b) 3x5 panel of 2D histograms representing Orc2 (a) and Mcm3 (b) ChIP  
 424 relative read frequency vs. RT (average  $\log_2(\text{Early/Late})$  over 100 kb binned according to the  
 425 decile of RT distribution). The analysis was performed in 10 kb windows. ChIP relative read  
 426 frequencies are normalized by column and represent the probability density function of ChIP  
 427 frequency at a given replication timing. The color legend is indicated on top. The columns of  
 428 each panel represent only windows present in intergenic regions (left column), silent genes  
 429 ( $\text{TPM} < 3$ , middle column), and expressed genes ( $\text{TPM} > 3$ , right column). TSSs and TTSs  
 430 proximal regions were not considered (see Material and Methods). The rows show either all  
 431 bins (top row), AS bins (predominant replication initiation, second row), DS bins (descending  
 432 segment, predominant replication termination, third row), URR bins (unidirectional  
 433 replication, no initiation, no termination, fourth row) and NRR bins (null RFD regions,  
 434 spatially random initiation and termination, bottom row). The number of bins per panel is  
 435 indicated in each panel. See Suppl. Fig. 7 for equivalent Orc3 and Mcm7 data. Refer to Suppl.  
 436 Fig. 8a for statistical significances.

437 Silent genes (middle column) mirror the ORC/MCM pattern of intergenic regions.

438 Expressed genes (right column) show lower ORC/MCM frequencies than intergenic

439 regions and silent genes, as expected. Kolmogorov-Smirnov statistics (Suppl. Fig. 8a)  
440 quantitatively show that in early- and mid-replicating regions, ORC/MCM relative  
441 frequency distributions are substantially different between expressed genes and  
442 intergenic regions as well as silent genes. In contrast, intergenic distributions in ASs  
443 and DSs are not different in most RT bins. In expressed genes, the ChIP depletion is  
444 more pronounced for MCM than ORC, as described in Fig. 3a. The dependence of the  
445 residual signal on RT is much attenuated, particularly for MCM, as expected if  
446 transcription completely removes this complex from active gene bodies.

447 In general, the global analysis of all windows, independent from RFD, demonstrates a  
448 genome-wide, monotonous relationship between ORC/MCM binding and RT that is  
449 only attenuated in transcribed genes. Furthermore, this analysis did not reveal any  
450 convincing differences in the levels of ORC/MCM between non-transcribed ASs,  
451 DSs, URRs, and NRRs when bins of similar RT were compared. The few (579) bins  
452 corresponding to ASs in active genes are probably misleading, as they are mainly  
453 attributable to annotation errors: the annotated gene overlapped the AS but the RNA-  
454 seq signal was confined outside the AS (Petryk et al., 2016). Note that NRRs are  
455 confined to late RT segments while URRs are enriched in mid-RT segments as  
456 previously noted (Petryk et al., 2016) and confirmed in Suppl. Fig. 7c.

457         Strictly speaking, the slope of a RFD segment is proportional to the difference  
458 between the density of initiation and termination events within the segment (Audit et  
459 al., 2013). Therefore, we cannot exclude delocalized initiation events within DSs,  
460 which explains why they were not significantly depleted in ORC/MCM compared to  
461 ASs (Suppl. Fig. 8a). In contrast, we can mostly exclude initiation events within  
462 URRs, although their ORC/MCM densities were not significantly lower than in ASs,

463 which are bona fide IZs, while NRRs, which presumably support spatially stochastic  
464 initiation present a smaller ORC density (Suppl. Fig. 8a).

465 Taken together, these results suggest that the density of ORC/MCM is not a  
466 reliable predictor of initiation probability, even though ORC density (and to a lesser  
467 extent MCM density) is well correlated with RT. Our results suggest that potential  
468 origins are widespread through the genome but that additional genetic or epigenetic  
469 factors regulate whether and when they fire.

470

471 LATE REPLICATING NON-GENIC ASS and NRRs ARE CHARACTERIZED BY  
472 H4K20ME3

473 The results above revealed a gradient of ORC/MCM according to RT. To  
474 confirm this observation, we extracted early and late RTDs employing a threshold of  
475  $\log_2(\text{Early/Late}) > 1.6$  for early RTDs and  $< -2.0$  for late RTDs, which resulted in 302  
476 early RTDs covering 642.8 Mb and 287 late RTDs covering 617.4 Mb of the genome.  
477 Restricting the analysis to intergenic regions, we calculated the mean ORC/MCM  
478 relative read frequencies in early compared to late RTDs. ORC was 1.4-times  
479 enriched in early RTDs compared to late RTDs (Fig. 5a, Suppl. Fig. 8b without input-  
480 correction, and Suppl. Table 2). Mcm3 and Mcm7 levels, although showing the same  
481 tendencies, were less contrasted than ORC and more influenced by input  
482 normalization (Fig. 5a, Suppl. Fig. 8b, Suppl. Table 2).

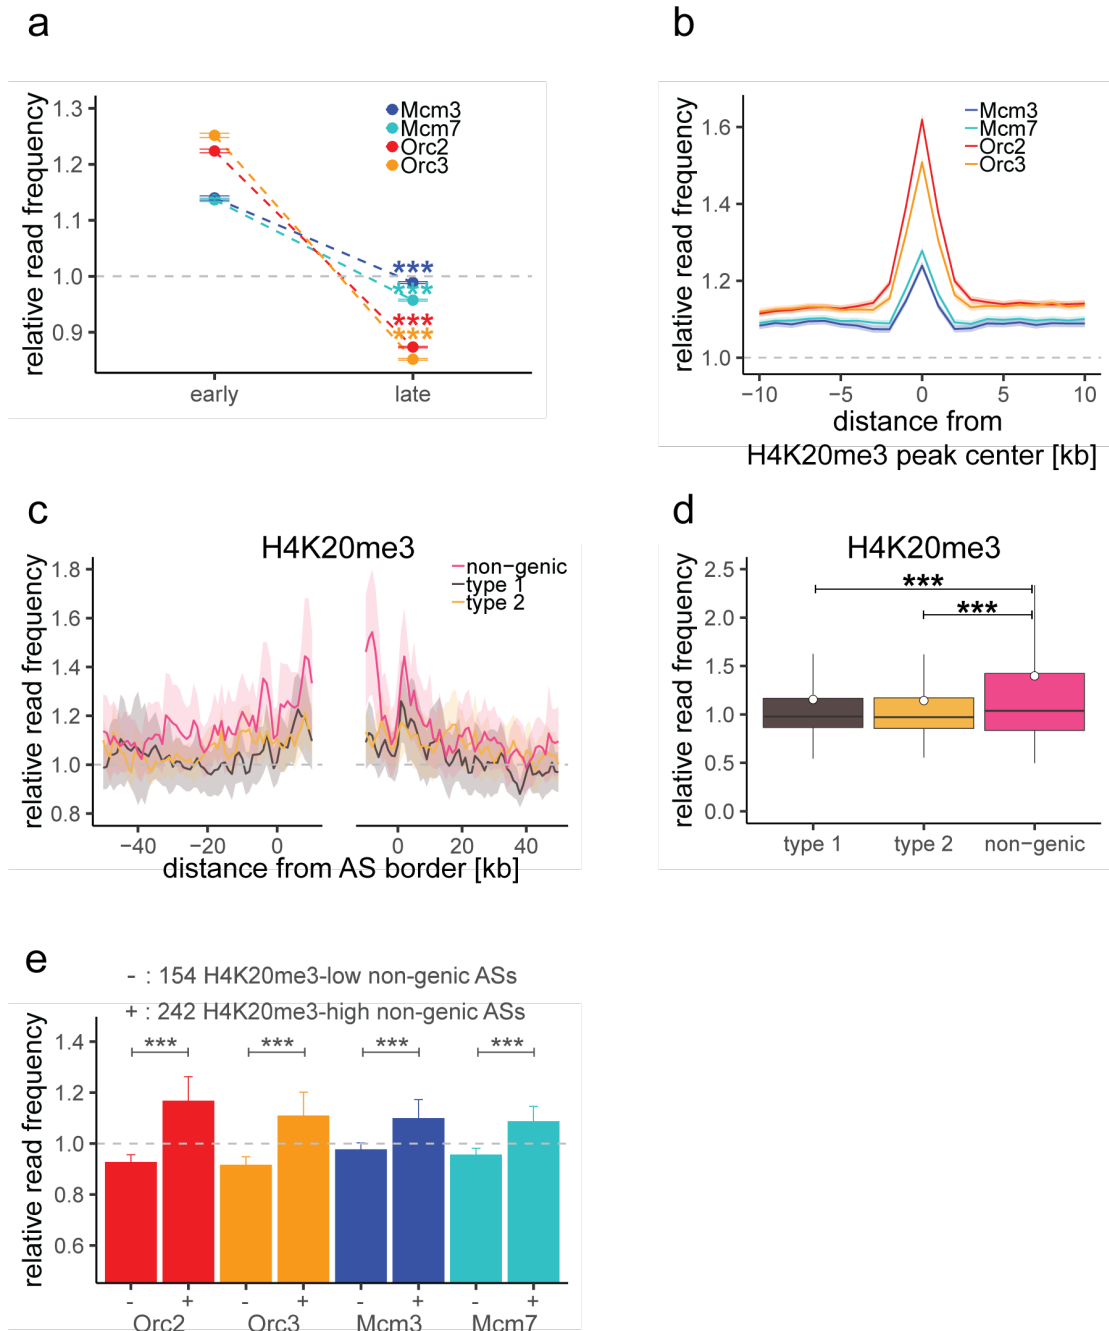

483

484 Figure 5: H4K20me3 selectively marks a subset of late replicating non-genic ASs.

485 a) ORC/MCM relative read frequencies ( $\pm 2 \times \text{SEM}$ ) in early or late RTDs. Early RTDs were  
 486 defined as  $\log_2(\text{Early/Late}) > 1.6$ ; late RTDs  $< -2.0$ . The analysis was performed in 10 kb  
 487 bins. Any gene  $\pm 10$  kb was removed from the analysis. Statistics were performed using one-  
 488 sided t-test. b) Average ORC/MCM relative read frequencies at H4K20me3 peaks ( $> 1$  kb). c)  
 489 H4K20me3 relative read frequencies at AS borders of the different AS types. Type 2 ASs are  
 490 oriented with their AS borders associated to transcribed genes at the right. Means of  
 491 H4K20me3 relative read frequencies are shown  $\pm 2 \times \text{SEM}$  (lighter shadows). d) Boxplot  
 492 representation of H4K20me3 relative read frequencies within the different AS types. Boxplot  
 493 represent the mean (circle), the median (thick line), the 1st and 3rd quartile (box), the 1st and  
 494 9th decile (whiskers) of the relative read frequencies in each AS type. Statistics were  
 495 performed by one-way ANOVA followed by Tukey's post-hoc test. e) Histogram



496 representation of mean  $\pm$  2 x SEM of ORC/MCM relative read frequencies at 242  
497 H4K20me3-low non-genic ASs and 154 H4K20me3-high non-genic ASs. Statistics were  
498 performed using one-sided t-test. \*\*\* p < 0.001.

499         We recently demonstrated that H4K20me3 is involved in licensing a subset of  
500 late replicating regions, often co-localizing with H3K9me3 (Benetti et al., 2007;  
501 Brustel et al., 2017; Pannetier et al., 2008). Here, we looked further into the relation  
502 between this epigenetic mark, ORC/MCM and replication initiation. We performed  
503 ChIP for H4K20me3 and its precursor H4K20me1 in three replicates for pre-  
504 replicative G1 chromatin, validated by qPCR (Suppl. Fig. 9a (H4K20me3) and 9b  
505 (H4K20me1)). After sequencing, we performed MACS2 broad peak-detection and  
506 kept only peaks overlapping in all three samples (16852 peaks for H4K20me3 and  
507 12264 peaks for H4K20me1, see also Suppl. Table 3 for further characterization).  
508 H4K20me3 peak sizes ranged from 200 bp to 105 kb (200 bp to 183 kb for  
509 H4K20me1, Suppl. Table 3, Suppl. Fig. 9c). When calculating ORC/MCM coverage  
510 at H4K20me3/me1 peaks > 1 kb (12251/6277 peaks, respectively), we predominantly  
511 detected ORC, but also some MCM enrichment at H4K20me3 sites (Fig. 5b). By  
512 contrast, H4K20me1 peaks were not enriched in both ORC and MCM (Suppl. Fig.  
513 9d).

514         We calculated H4K20me3 coverage at the different AS types and specifically  
515 detected an increased H4K20me3 signal in non-genic ASs, representing the first  
516 histone modification characterizing late replicating ASs (Fig. 5c and 5d). Starting  
517 from 506 non-genic ASs, we extracted two subsets of 154 and 242 non-genic ASs  
518 where H4K20me3 relative read frequencies were respectively above the mean  
519 genome value by more than 1.5x standard deviation or below the genome mean value.  
520 We found that ORC/MCM were enriched at the H4K20me3-high subgroup compared  
521 to the H4K20me3-low subgroup (Fig. 5e). These results suggest that the presence of

522 H4K20me3 at transcriptionally independent, non-genic ASs may contribute to  
 523 specifying these regions as Ma-IZs at the origin-licensing step.

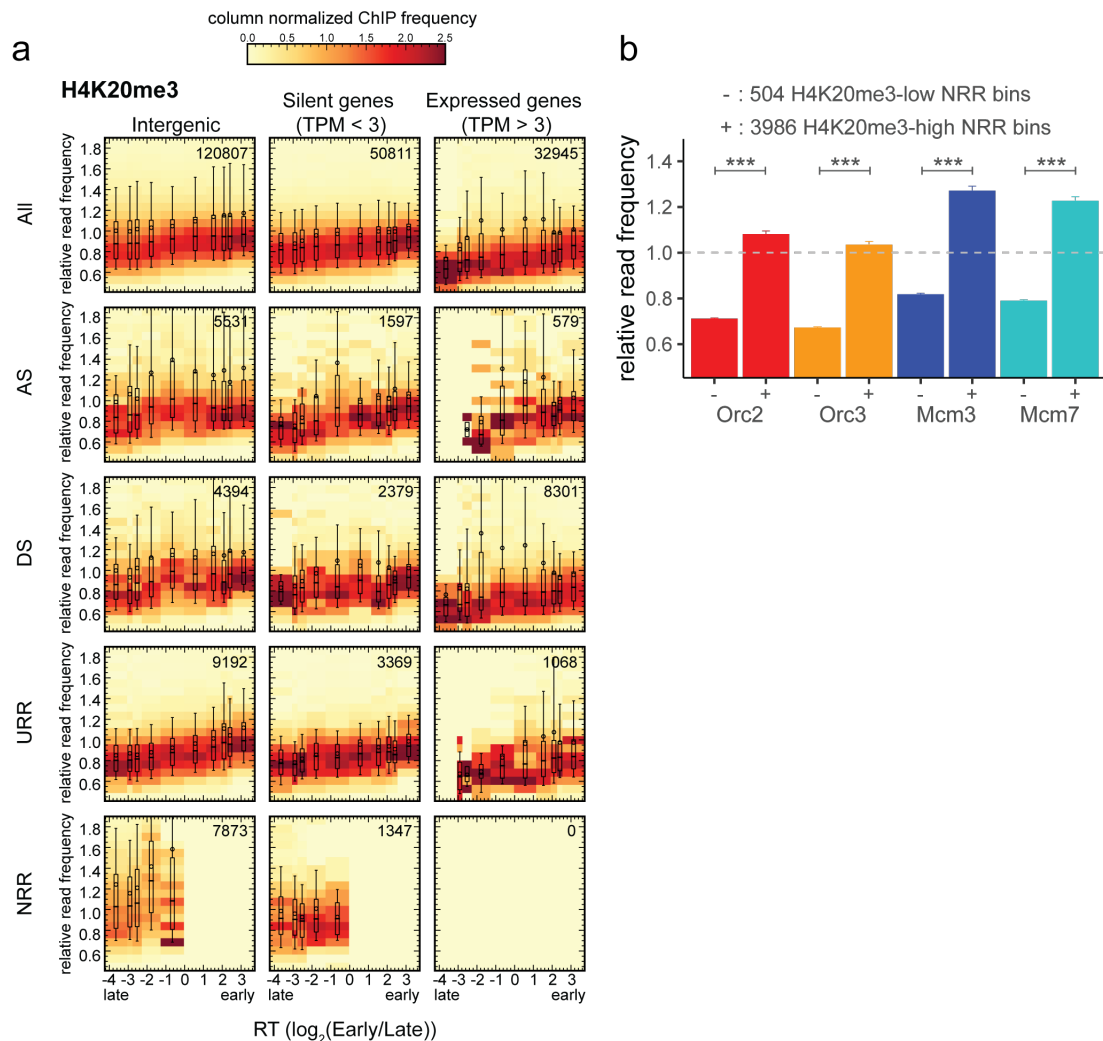

524

525 Figure 6: H4K20me3 is enriched in late replicating regions of null RFD (NRR).

526 a) 3x5 panel of 2D histograms representing H4K20me3 ChIP relative read frequencies vs. RT  
 527 (average  $\log_2(\text{Early/Late})$ ) over 100 kb binned according to the decile of RT distribution). The  
 528 analysis was performed in 10 kb windows. H4K20me3 relative read frequencies are  
 529 normalized by column and displayed for different window categories (columns: intergenic  
 530 regions, silent genes, expressed genes; rows: all bins, AS-, DS-, URR-, NRR bins) as for  
 531 ORC/MCM in Fig. 4. The number of bins per panel is indicated in each panel. Superimposed  
 532 boxplots represent the mean (circle), the median (thick line), the 1st and 3rd quartile (box),  
 533 the 1st and 9th decile (whiskers) of the relative read frequencies in each timing bins. Refer to  
 534 Suppl. Fig. 8c for statistical significances. b) Histogram representation of mean  $\pm 2 \times \text{SEM}$  of  
 535 ORC/MCM relative read frequencies at 504 H4K20me3-low NRR 10 kb bins and 3986  
 536 H4K20me3-high NRR 10 kb bins. Statistics were performed using one-sided t-test. \*\*\*  $p <$   
 537 0.001.  
 538

539 To further explore the links between H4K20me3 and replication initiation  
540 capability, we analyzed the density of this modification in genome segments of  
541 various RT, gene activity and RFD patterns (Fig. 6a), as performed for ORC/MCM in  
542 Fig. 4 and Suppl. Fig. 7d and 7e. Several interesting observations emerged from this  
543 analysis. First, the H4K20me3 level was weakly but systematically more abundant in  
544 early than in late replicating DNA. Second, the H4K20me3 level was slightly lower in  
545 transcribed genes than in the non-transcribed rest of the genome (Fig. 6a and Suppl.  
546 Fig 9e). Third, AS and DS bins showed comparable distributions of H4K20me3 levels  
547 at comparable RT and gene expression status (Fig. 6a and Suppl. Fig 9e). These  
548 results are, at first glance reminiscent of ORC/MCM distributions. However,  
549 ORC/MCM distributions are more pronounced as the RT gradient is stronger and the  
550 differences between expressed genes and non-transcribed intergenic regions and silent  
551 genes are more salient (Fig. 4 and Fig. 6a). NRRs showed a very different, broader  
552 distribution of H4K20me3 levels, including a higher proportion of windows with a  
553 strong H4K20me3 signal, especially compared to URRs (compare boxplots in Fig. 6a,  
554 Fig. 6b). A specific enrichment of H4K20me3 is therefore detected not only in late,  
555 non-genic AS segments but also in late-replicating gene deserts of null RFD, which  
556 presumably replicate by widespread and spatially random initiation.

557 The finding that the H4K20me3 levels are more broadly distributed in NRRs  
558 suggests that ORC/MCM levels might also differ between H4K20me3-high and -low  
559 NRRs. We repeated the analysis of ORC/MCM enrichment at H4K20me3-high and -  
560 low 10 kb intergenic bins in NRRs. Similar to non-genic ASs, we also observed that  
561 ORC/MCM is more abundant at H4K20me3-high than -low bins (Fig. 5e, and 6b),  
562 supporting the hypothesis that this modification also facilitates origin licensing in  
563 these heterochromatic segments.

## 564 **Discussion**

565           The study presented here provides a novel comprehensive genome-wide  
566 analysis of multiple pre-RC proteins, replication initiation, and replication timing in  
567 human cells. We find a widespread presence of ORC/MCM throughout the genome,  
568 with variations that only depend on RT or active transcription. ORC/MCM are  
569 depleted from transcribed genes and enriched at TSSs. ORC/MCM are more abundant  
570 in early than in late RTDs. The even distribution of ORC/MCM observed within IZs  
571 is consistent with OK-seq results suggesting a homogeneous initiation probability  
572 from any site within any given IZ. However, when RT and transcriptional effects are  
573 controlled, no significant differences in ORC/MCM densities are detected between  
574 IZs, TZs, URRs and NRRs, which sustain different patterns of origin activity. We  
575 consequently propose that potential origins, defined by loaded MCM-DHs, are  
576 widespread through the genome, but their activation in S phase is regulated by  
577 additional genetic and/or epigenetic factors. We previously reported that IZs are  
578 enriched in open chromatin marks typical of active or poised enhancers (Petryk et al.,  
579 2016), which suggests why IZs are more accessible to firing factors than flanking  
580 segments with comparable MCM-DH density. We further show that a subset of non-  
581 genic late IZs, and late, randomly replicating gene deserts, are enriched in  
582 H4K20me3, which helps to recruit ORC/MCM.

583           Our data suggest that transcription has both positive and negative effects on  
584 origin activity. We found that actively transcribed gene bodies flanking type 1 and  
585 type 2 ASs are depleted of ORC/MCM (Fig. 2, and Fig. 3a). We propose that active  
586 transcription removes ORC/MCM from transcribed gene bodies, which negatively  
587 affects their replication initiation capacity. MCM-DH depletion from transcribed gene  
588 bodies was previously reported in *Drosophila* (Powell et al., 2015). Experiments in

589 yeast have shown that RNA polymerases push MCM-DHs along the DNA and  
590 redistribute them to shift replication initiation sites (Gros et al., 2015). A number of  
591 previous studies have suggested that replication does not initiate within transcribed  
592 genes (Hamlin et al., 2010; Hyrien et al., 1995; Knott et al., 2009; Macheret &  
593 Halazonetis, 2018; Martin et al., 2011; Sasaki et al., 2006). Oncogene expression, by  
594 abridging G1 phase, allows the ectopic activation of intragenic origins normally  
595 suppressed by transcription in G1 resulting in genomic instability (Macheret &  
596 Halazonetis, 2018). All these findings are consistent with an inhibitory effect of  
597 transcription on local replication initiation that is important for genome stability. Why  
598 forks emitted by ectopic, intragenic origins are more prone to genomic destabilisation  
599 than forks emitted outside, but progressing into genes, is unclear at present.

600         On the other hand, ORC and to a lesser degree MCM, are enriched at active  
601 TSSs. Active TSSs are regions of open chromatin structure characterized by high  
602 DNase- or MNase hypersensitivity, a hallmark of Ma-IZs (Boulos et al., 2015; Papior  
603 et al., 2012). ORC chromatin binding is known to favor open chromatin sites (Miotto  
604 et al., 2016), situating active TSSs as hotspots of ORC binding. The slope of  
605 aggregate RFD profiles around meta-TSSs is higher at TSSs than in upstream IZs,  
606 suggesting a higher probability of initiation at TSSs (Chen et al., 2019). However, a  
607 part of this effect may result from averaging multiple IZs that all end at a TSS but  
608 initiate replication at different upstream distances from the respective TSS. When  
609 individual IZs are examined, the RFD slope is not obviously increasing at the TSS  
610 (data not shown). Furthermore, the most efficient initiation sites identified by  
611 EdUseq-HU within IZs are associated with poly(dA:dT) tracts but are not enriched at  
612 TSSs (Tubbs et al., 2018). We find here that MCMs, which mark potential initiation  
613 sites, are less enriched at TSSs than ORC. Furthermore, MCMs are distributed fairly

614 evenly upstream and downstream of transcribed gene bodies (Fig. 3a), arguing against  
615 a role for TSSs in directing MCM-DH loading specifically upstream of genes.

616 H4K20 methylation has multiple functions in ensuring genome integrity, such  
617 as DNA replication (Beck et al., 2012; Picard et al., 2014; Tardat et al., 2010), DNA  
618 damage repair, and chromatin compaction (Jorgensen et al., 2013; Nakamura et al.,  
619 2019; Shoaib et al., 2018), suggesting that the different functions are context-  
620 dependent and executed with different players. We previously demonstrated that  
621 H4K20me3 provides a platform to enhance licensing in late replicating  
622 heterochromatin (Brustel et al., 2017). Here, we detect both elevated ORC and MCM,  
623 when selecting for H4K20me3-enriched, non-genic ASs and NRRs (Fig 5e and 6b).  
624 Together with our previous observations (Brustel et al., 2017), we conclude that  
625 H4K20me3 is important for the licensing of at least a subset of late replicating origins  
626 in non-genic ASs and NRRs. It remains unclear whether additional chromatin features  
627 are required for licensing the remaining, H4K20me3-low non-genic ASs.

628 In higher eukaryotes, it is controversially discussed whether replication timing  
629 is determined by ORC (Dellino et al., 2013; Miotto et al., 2016) or MCM-DH (Das et  
630 al., 2015; Hyrien, 2016) abundance. However, potential origins are defined by  
631 assembled MCM-DHs, not by ORC. The weak correlation of MCM density with RT,  
632 and the lack of correlation with initiation capability of ASs, DSs and URRs, appear  
633 inconsistent with regulation of RT by MCM-DH density (Fig. 4b, Suppl. Fig. 7e, and  
634 Fig. 5a). We conclude that MCM-DH density therefore is not a reliable predictor of  
635 RT or RFD profiles and is unlikely to be a major determinant of RT itself. The  
636 correlation of ORC density with RT is more convincing but not necessarily causative.  
637 For example, open chromatin independently facilitates ORC binding in G1 phase and

638 access of firing factors to MCM-DHs in S phase, resulting in correlation of  
639 ORC/MCM density with RT without implying any causal link.

640 The spatio-temporal replication program is relatively well conserved in  
641 consecutive replication cycles for each cell type, differs only slightly between cell  
642 lines and changes during differentiation (Hadjadj et al., 2016). Comparison with  
643 chromatin conformation capture (Hi-C) data have shown that early and late RTDs  
644 correspond to the more and less accessible compartments of the genome, respectively  
645 (Ryba et al., 2010). A higher density of chromatin interactions characterizes less  
646 accessible domains. Furthermore, both constitutive and developmentally regulated  
647 RTD boundaries align to the boundaries of topological domains, which are  
648 remarkably stable between cell types (Fragkos et al., 2015; Pope et al., 2014), and  
649 enriched in IZs (Baker et al., 2012; Petryk et al., 2016). Recently, Sima et al. used the  
650 CRISPR-Cas9 technology to identify three separate, cis-acting elements that together  
651 control the early replication time of the pluripotency-associated Dppa2/4 domain in  
652 mouse embryonic stem cells (mESCs) (Sima et al., 2019). Strikingly, these "early  
653 replication control elements" (ERCEs) are enriched in CTCF-independent Hi-C  
654 interactions and in active epigenetic marks (DNase1 HS, p300, H3K27ac, H3K4me1,  
655 H3K4me3) previously observed at OK-seq IZs (Petryk et al., 2018; Petryk et al.,  
656 2016). By mining mESC OK-seq data (Petryk et al., 2018), we found that the three  
657 ERCEs of the Dppa2/4 domain indeed fall within IZs (Suppl. Fig. 10a). Furthermore,  
658 the aggregate 1,835 ERCEs predicted genome-wide by Sima et al., from these and  
659 additional epigenetic properties of mESCs, show a significant, positive RFD shift  
660 indicative of efficient replication initiation (Suppl. Fig. 10b). This finding is  
661 confirmed in proliferating PHA-stimulated primary splenic B cells, (Suppl. Fig. 10c),  
662 attesting to the general validity of these observations.

663 Our data suggest that a higher ORC/MCM density *is not* a distinguishing  
664 feature of IZs from the rest of the non-transcribed genome. IZ specification therefore  
665 appears to occur at the origin activation rather than licensing step, which may be  
666 explained if the open chromatin structure found at Ma-IZs and ERCEs (Petryk et al.,  
667 2016; Sima et al., 2019) facilitates preferential accessibility to limiting firing factors  
668 during S phase (Boos & Ferreira, 2019). This is in line with the previously proposed  
669 cascade model in which replication of the human genome involves a superposition of  
670 efficient initiation at Ma-IZs identified by RFD ASs, followed by a cascade of more  
671 dispersive, less efficient origin activation along the intervening segments (Petryk et  
672 al., 2016; Wu et al., 2018).

673

## 674 **CONCLUSION**

675 The mapping of ORC and MCM complexes reported here shows that in  
676 human cells, most of the genome, except transcribed genes, is licensed for replication  
677 during the G1 phase of the cell cycle. ORC/MCM are thereby more enriched in early  
678 than in late RTDs (Fig. 7a). Only a fraction of MCM-DHs is selected for initiation  
679 during S phase. Open chromatin marks define preferential IZs, often but not always  
680 circumscribed by active genes (Fig. 7b). Once forks emanate from Ma-IZs within an  
681 RTD, a cascade of replication activation may take place dispersedly between IZs due  
682 to the omnipresence of MCM-DHs (Fig. 7b). The preferential binding of ORC in G1,  
683 and preferential access of firing factors in S to open chromatin, appears sufficient to  
684 explain why ORC/MCM levels correlate with RT. Replication licensing of  
685 heterochromatic gene deserts is, for example facilitated by H4K20me3, which helps  
686 ORC and MCM-DH recruitment and supports origin activity in these less accessible  
687 chromatin segments (Fig. 7c). The identification of ERCEs supports the hypothesis



688 that combinations of additional chromatin and DNA features regulate the probability  
 689 of origin activation. This provides organizational links between active transcription  
 690 and replication initiation, operating during origin licensing and activation, which  
 691 facilitate the timely activation of appropriate replication origins for genome stability  
 692 during programmed development as well as altered gene expression patterns caused  
 693 by environmental cues.

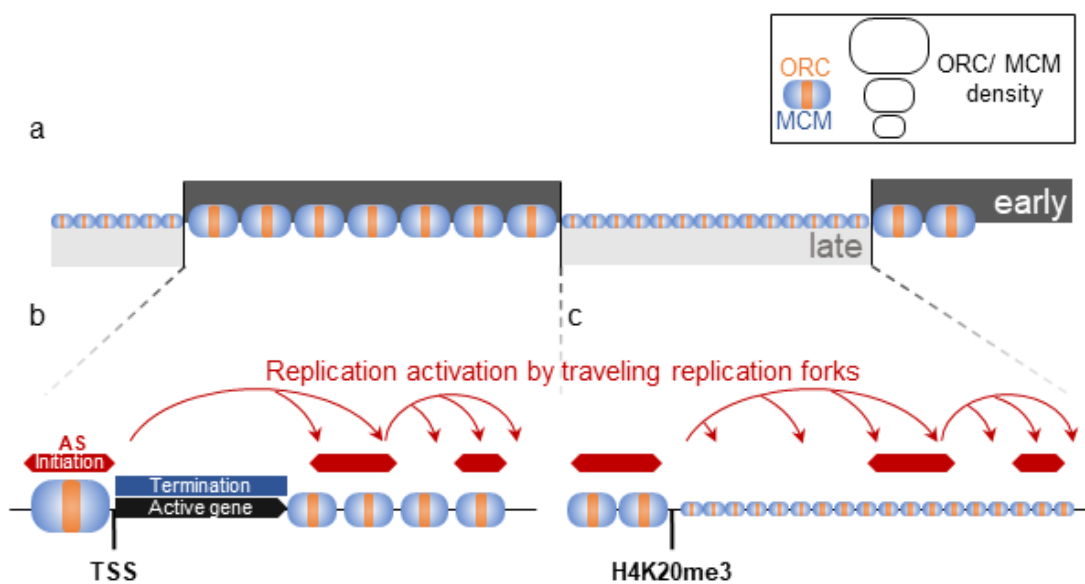

694

695 Figure 7: Model for replication organization in higher eukaryotes.

696 a) Replication is organized in large segments of constant replication timing (early RTD, dark  
 697 grey; late RTD, light grey), (Marchal et al., 2019). While we observe a homogeneous pattern  
 698 of ORC (orange) and MCM (blue) throughout the genome, the enrichment levels of  
 699 ORC/MCM were higher in early RTDs compared to late RTDs. b) Early RTDs are amongst  
 700 other characterized by active transcription. ORC/MCM are locally highly enriched at active  
 701 TSS. However, actively transcribed gene bodies (black) are deprived of ORC/MCM, often  
 702 correlating with replication termination (blue). Besides TSSs, we find ORC/MCM  
 703 stochastically distributed along intergenic regions. We hypothesize that traveling replication  
 704 forks trigger activation of replication in a cascade (red arrows). c) In gene deprived and  
 705 transcriptionally silent late replicating heterochromatin, we detected homogeneous  
 706 ORC/MCM distribution at generally lower levels. H4K20me3 is present at late replicating  
 707 non-genic ASs and NRRs and leads to enhanced ORC/MCM binding, linking this histone  
 708 mark to replication activation in heterochromatin.

709

## 710 **Material and Methods**

### 711 **Cell culture**

712 Raji cells (ATCC) were cultivated at 37°C and 5% CO<sub>2</sub> in RPMI 1640  
713 (Gibco, Thermo Fisher, USA) supplemented with 8% FCS (Lot BS225160.5,  
714 Bio&SELL, Germany), 100 Units/ml Penicillin, 100 µg/ml Streptomycin (Gibco,  
715 Thermo Fisher, USA), 1x MEM non-essential amino acids (Gibco, Thermo Fisher,  
716 USA), 2 mM L-Glutamin (Gibco, Thermo Fisher, USA), and 1 mM Sodium pyruvate  
717 (Gibco, Thermo Fisher, USA).

718

### 719 **RNA extraction, sequencing, TPM calculation**

720 RNA was extracted from 3 x 10<sup>5</sup> Raji cells using Direct-zol™ RNA  
721 MiniPrep kit (Zymo Research) according to manufacturers' instructions. RNA quality  
722 was confirmed by Bioanalyzer RNA integrity numbers between 9.8 and 10 followed  
723 by library preparation (Encore Complete RNA-Seq Library Systems kit (NuGEN)).  
724 Single-end 100 bp sequencing was performed by Illumina HiSeq 1500 to a  
725 sequencing depth of 25 million reads. The reads were mapped to hg19 genome using  
726 Tophat2 and assigned to annotated genes (HTSeq-count) (Anders et al., 2015; Kim et  
727 al., 2013). TPM values (Transcripts per kilobase per million reads) were calculated  
728 for each sample ( $TPM_j = 10^6 \frac{n_j}{l_j} / \sum_i \frac{n_i}{l_i}$  where  $n_i$  is the number of reads that map to  
729 gene  $i$  whose total exon length expressed in kb is  $l_i$ ) as previously described (Wagner  
730 et al., 2012).

731

### 732 **Replication fork directionality profiling using OK-seq method in Raji**

733 Raji OK-seq was recently published as part of Wu *et al.* and is available from  
734 the European Nucleotide Archive under accession number PRJEB25180 (see data

735 access section) (Wu et al., 2018). Reads > 10 nt were aligned to the human reference  
736 genome (hg19) using the BWA (version 0.7.4) software with default parameters (Li &  
737 Durbin, 2009). We considered uniquely mapped reads only and counted identical  
738 alignments (same site and strand) as one to remove PCR duplicate reads. Five  
739 biological replicates were sequenced providing a total number of 193.1 million  
740 filtered reads (between 19.1 and 114.1 million reads per replicate). RFD was  
741 computed as  $RFD = \frac{(R-F)}{(R+F)}$ , where "R" (resp. "F") is the number of reads mapped to  
742 the reverse (resp. forward) strand of the considered regions. RFD profiles from  
743 biological replicates were highly correlated, with Pearson correlation computed in 50  
744 kb non-overlapping windows with > 100 mapped reads (R+F) ranging from 0.962 to  
745 0.993. Reads from the 5 replicate experiments were pooled together for further  
746 analyses.

747

#### 748 **Determining regions of ascending, descending and constant RFD**

749 RFD profiling of 2 human cell lines revealed that replication primarily  
750 initiates stochastically within broad (up to 150 kb) zones and terminates dispersedly  
751 between them (Petryk et al., 2016). These initiation zones correspond to quasi-linear  
752 ascending segments (ASs) of varying size and slope within the RFD profiles. As  
753 previously described for mean replication timing profiles analysis (Audit et al., 2013;  
754 Baker et al., 2012), we determined the smoothed RFD profile convexity from the  
755 convolution with the second derivative of the Gaussian function of standard deviation  
756 32 kb. 4891 ASs were delineated as the regions between positive and negative  
757 convexity extrema of large amplitude. The amplitude threshold was set in a  
758 conservative manner in order to mainly detect the most prominent IZs described by  
759 Petryk et al. (2016) and avoid false positives. Descending segments (DSs) were

760 detected symmetrically to ASs, as regions between negative and positive convexity  
761 extrema using the same threshold. Noting *pos\_5'* and *pos\_3'* the location of the start  
762 and end position of an AS or DS segment, each segment was associated to its size  
763 *pos\_3'-pos\_5'* and the RFD shift across its length:  $\Delta\text{RFD} = \text{RFD}(\textit{pos}_5') - \text{RFD}$   
764  $(\textit{pos}_3')$ . DS segments were less numerous (2477 vs 4891) and on average larger (126  
765 kb vs 38.8 kb) than AS segments as expected and presented a smaller average RFD  
766 shift ( $|\Delta\text{RFD}|=0.69$  vs 0.83).

767 Initial RFD profiling in human also revealed regions of unidirectional fork  
768 progression and regions of null RFD where replication is bidirectional. Unidirectional  
769 replicating regions (URRs) were delineated as regions where  $|\Delta\text{RFD}|>0.8$   
770 homogeneously over at least 300 kb (401 regions of mean length 442 kb covering 177  
771 Mb). Null RFD regions (NRRs) were delineated as regions where  $|\Delta\text{RFD}|<0.15$   
772 homogeneously over at least 500 kb (127 regions of mean length 862 kb covering 110  
773 Mb). Thresholds were set in a conservative manner to avoid false positive, in  
774 particular not to confuse RFD zero-crossing segments with NRR.

775

#### 776 **Centrifugal elutriation and flow cytometry**

777 For centrifugal elutriation,  $5 \times 10^9$  exponentially growing Raji cells were  
778 harvested, washed with PBS and resuspended in 50 ml RPMI 1680, 8% FCS, 1mM  
779 EDTA, 0.25 U/ml DNaseI (Roche, Germany). Concentrated cell suspension was  
780 passed through 40  $\mu\text{m}$  cell strainer and injected in a Beckman JE-5.0 rotor with a  
781 large separation chamber turning at 1500 rpm and a flow rate of 30 ml/min controlled  
782 by a Cole-Parmer Masterflex pump. While rotor speed was kept constant, 400 ml  
783 fractions were collected at increasing flow rates (40, 45, 50, 60, 80 ml/min).  
784 Individual fractions were quantified,  $5 \times 10^6$  cells washed in PBS, ethanol fixed,

785 RNase treated and stained with 0.5 mg/ml Propidium Iodide. DNA content was  
786 measured using the FL2 channel of FACSCalibur<sup>TM</sup> (BD Biosciences, Germany).  
787 Remaining cells were subjected to chromatin cross-linking.

788

#### 789 **Chromatin cross-linking with formaldehyde**

790 Raji cells were washed twice with PBS, resuspended in PBS to a concentration  
791 of  $2 \times 10^7$  cells/ml and passed through 100  $\mu\text{m}$  cell strainer (Corning Inc., USA).  
792 Fixation for 5 min at room temperature was performed by adding an equal volume of  
793 PBS 2% methanol-free formaldehyde (Thermo Scientific, USA, final concentration:  
794 1% formaldehyde) and stopped by the addition of glycine (125 mM final  
795 concentration). After washing once with PBS and once with PBS 0.5% NP-40, cells  
796 were resuspended in PBS containing 10% glycerol, pelleted and snap frozen in liquid  
797 nitrogen.

798

#### 799 **Cyclin Western Blot**

800 Cross-linked samples were thawed on ice, resuspended in LB3+ sonication  
801 buffer containing protease inhibitor and 10 mM MG132. After sonicating 3 x 5 min  
802 (30 sec on, 30 sec off) using Bioruptor in presence of 212-300  $\mu\text{m}$  glass beads,  
803 samples were treated with 50 U Benzonase for 15 min at room temperature and  
804 centrifuged 15 min at maximum speed. 50  $\mu\text{g}$  protein lysates were loaded on 10%  
805 SDS-polyacrylamid gel (Cyclin A1/A2, Cyclin B1), or 12.5%-15% gradient gel  
806 (H3S10P). Cyclin A1/A2 (Abcam, ab185619), Cyclin B1 (Abcam, ab72), H3S10P  
807 (Cell signaling, D2C8) antibodies were used in 1:1000 dilutions, GAPDH (clone  
808 GAPDH3 10F4, rat IgG2c; Monoclonal Antibody Core Facility, Helmholtz Center

809 München) was diluted 1:50. HRP-coupled secondary antibodies were used in 1:10000  
810 dilutions. Detection was done using ECL on CEA Blue Sensitive X-ray films.

811

812

### 813 **Chromatin sonication**

814 Cross-linked cell pellets were thawed on ice, resuspended LB3+ buffer (25  
815 mM HEPES (pH 7.5), 140 mM NaCl, 1 mM EDTA, 0.5 mM EGTA, 0.5% Sarkosyl,  
816 0.1% DOC, 0.5% Triton-X-100, 1X protease inhibitor complete (Roche, Germany))  
817 to a final concentration of  $2 \times 10^7$  cells/ml. Sonication was performed in AFA Fiber &  
818 Cap tubes (12x12 mm, Covaris, Great Britain) at an average temperature of 5°C at  
819 100W, 150 cycles/burst, 10% duty cycle, 20 min using the Covaris S220 (Covaris  
820 Inc., UK) resulting in DNA fragments of 100-300bp on average.

821

### 822 **Chromatin immunoprecipitation and qPCR quality control**

823 Sheared chromatin was pre-cleared with 50 µl protein A Sepharose 4 Fast  
824 Flow beads (GE Healthcare, Germany) per 500 µg chromatin for 2h. 500 µg  
825 chromatin (or 250 µg for histone methylation) were incubated with rabbit anti-Orc2,  
826 anti-Orc3, anti-Mcm3, anti-Mcm7 (Papior et al., 2012), mouse anti-H4K20me1  
827 (Diagenode, MAb-147-100), rabbit anti-H4K20me3 (Diagenode, MAb-057-050), or  
828 IgG isotype controls for 16h at 4°C. BSA-blocked protein A beads (0.5 mg/ml BSA,  
829 30 µg/ml salmon sperm, 1X protease inhibitor complete, 0.1% Triton-X-100 in LB3(-  
830 ) buffer (without detergents)) were added (50 µl/500 µg chromatin) and incubated for  
831 at least 4h on an orbital shaker at 4°C. Sequential washing steps with RIPA (0.1%  
832 SDS, 0.5% DOC, 1% NP-40, 50 mM Tris (pH 8.0), 1 mM EDTA) 150mM NaCl,  
833 RIPA-300 mM NaCl, RIPA-250 mM LiCl buffer, and twice in TE (pH 8.0) buffer

834 were performed. Immunoprecipitated chromatin fragments were eluted from the  
835 beads by shaking twice at 1200 rpm for 10 min at 65°C in 100µl TE 1% SDS. The  
836 elution was treated with 80 µg RNase A for 2h at 37°C and with 8 µg proteinase K at  
837 65°C for 16h. DNA was purified using the NucleoSpin Extract II Kit. Quantitative  
838 PCR analysis of the EBV *oriP* DS element (for pre-RC ChIP), or H4K20me1 and -  
839 me3 positive loci were performed using the SYBR Green I Master Mix (Roche) and  
840 the Roche LightCycler 480 System. Oligo sequences for qPCR were DS\_fw:  
841 AGTTCACTGCCCGCTCCT, DS\_rv: CAGGATTCCACGAGGGTAGT,  
842 H4K20me1positive\_fw: ATGCCTTCTTGCCTCTTGTC, H4K20me1positive\_rv:  
843 AGTTAAAAGCAGCCCTGGTG, H4K20me3positive\_fw:  
844 TCTGAGCAGGGTTGCAAGTAC, H4K20me3positive\_rv:  
845 AAGGAAATGATGCCCAGCTG. Chromatin fragment sizes were verified by  
846 loading 1-2 µg chromatin on a 1.5% agarose gel. Samples were quantified using  
847 Qubit HS dsDNA.

848

#### 849 **ChIP-sample sequencing**

850 ChIP sample library preparations from > 4 ng of ChIP-DNA was performed  
851 using Accel-NGS® 1S Plus DNA Library Kit for Illumina (Swift Biosciences). 50 bp  
852 single-end sequencing was done with the Illumina HiSEQ 1500 sequencer to a  
853 sequencing depth of ~ 70 million reads. Fastq-files were mapped against the human  
854 genome (hg19, GRCh37, version 2009), extended for the EBV genome (NC007605)  
855 using bowtie (v1.1.1), (Langmead et al., 2009). Sequencing profiles were generated  
856 using deepTools' bamCoverage function using reads extension to 200 bp and reads per  
857 genomic content (RPGC) normalization (Ramirez et al., 2014). Visualization was

858 performed in UCSC Genome Browser (<http://genome.ucsc.edu>) and the Integrated  
859 Genome Browser (Kent et al., 2002).

860 For H4K20me1 and -me3 ChIP-seq data, MACS2 peak-calling (Zhang et al.,  
861 2008) was performed using the broad setting and overlapping peaks in three replicates  
862 were retained for further analyses.

863

#### 864 **Binning approach and normalization**

865 All data processing and analysis steps were performed in R (v.3.2.3) and  
866 numpy (v.1.18.5) python library, visualizations were done using the ggplot2 (v3.1.0)  
867 package (R\_Core\_Team, 2018) and matplotlib (v.3.2.3) python library. The numbers  
868 of reads were calculated in non-overlapping 1 or 10 kb bins and saved in bed files for  
869 further analysis. To combine replicates, their sum per bin was calculated (= read  
870 frequency). To adjust for sequencing depth, the mean frequency per bin was  
871 calculated for the whole sequenced genome and all bins' counts were divided by this  
872 mean value resulting in the normalized read frequency. To account for variations in  
873 the input sample, we additionally divided by the normalized read frequency of the  
874 input, resulting in the relative read frequency. When aggregating different loci, input  
875 normalization was performed after averaging. This resulted in relative read frequency  
876 ranging from 0 to ~30. Pair-wise Pearson correlations of ORC/MCM samples were  
877 clustered by hierarchical clustering using complete linkage clustering.

878

#### 879 **Relation of ChIP relative read frequencies to DNase hypersensitivity**

880 The ENCODE 'DNase clusters' track wgEncodeRegDnaseClusteredV3.bed.gz  
881 (03.12.2017) containing DNase hypersensitive sites from 125 cell lines were retrieved



882 from (Thurman et al., 2012). Bins overlapping or not with HS sites larger than 1 kb  
883 were defined and the respective ChIP read frequency assigned for comparison.

884

### 885 **Comparison of ChIP relative read frequencies to replication data**

886 ASs were aligned on their left (5') and right (3') borders. Mean and standard  
887 error of the mean (SEM) of relative read frequencies of aligned 1 kb bins were then  
888 computed to assess the average ChIP signal around the considered AS borders 50 kb  
889 away from the AS to 10 kb within the AS. To make sure bins within the ASs were  
890 closer to the considered AS border than to the opposite border, only ASs of size >20  
891 kb were used (3247/4891). We also limited this analysis to ASs corresponding to  
892 efficient initiation zones by requiring  $\Delta\text{RFD} > 0.5$ , filtering out a further 290 lowly  
893 efficient ASs.

894 In order to interrogate the relationship between ASs and transcription, we  
895 compared the results obtained for different AS groups: 506 ASs were classified as  
896 non-genic AS when the AS locus extended 20-kb at both ends did not overlap any  
897 annotated gene; the remaining 2451 ASs were classified as genic ASs. From the latter  
898 group, 673 ASs were classified as type 1 ASs when both AS borders were flanked  
899 by at least one actively transcribed genes (distance of both AS borders to the closest  
900 transcribed (TPM > 3) gene body was < 20 kb), and 1026 ASs were classified as type  
901 2 ASs when only one AS border was associated to a transcribed gene (see also  
902 Table 1).

903 In order to assess the role of H4H20me3 mark on AS specification, we also  
904 classified non-genic ASs depending on their input normed H4K20me3 relative read  
905 frequency. We grouped the non-genic ASs where the H4K20me3 relative read  
906 frequency was above the genome mean value by more than 1.5 standard deviation

907 (estimated over the whole genome) and the non-genic ASs where the H4K20me3  
908 relative read frequency was below the genome mean value. This resulted in 154 non-  
909 genic ASs with H4K20me3 signal significantly higher than genome average and 242  
910 non-genic ASs with H4K20me3 signal lower than genome average.

911 A similar selection was performed on fully intergenic 10 kb windows within  
912 NRRs (as done above using the mean and standard deviation of H4K20me3 relative  
913 read frequency estimated on all fully intergenic 10 kb windows). This resulted in 504  
914 and 3986 windows with high and low H4K20me3 signal, respectively.

915

#### 916 **Comparison of ChIP relative read frequencies to transcription data**

917 Gene containing bins were determined and overlapping genes removed from  
918 the analysis. For cumulative analysis, we only worked with genes larger 30 kb, and  
919 assigned the gene expression levels in TPM accordingly. Genes were either aligned at  
920 their transcriptional start site (TSS) or their transcriptional termination site (TTS) and  
921 the corresponding ChIP read frequencies were calculated in a 30 kb window around  
922 the site.

923

#### 924 **Comparison of ChIP relative read frequencies to replication timing**

925 For identification of RTDs in Raji cells, we used the early to late replication  
926 timing ratio determined by Repli-seq (Sima et al., 2018). We directly worked from the  
927 precomputed early to late log-ratio from supplementary file  
928 GSE102522\_Raji\_log2\_hg19.txt downloaded from GEO (accession number  
929 GSE102522). The timing of every non-overlapping 10 kb bin was calculated as the  
930 averaged  $\log_2(\text{Early/Late})$  ratio within the surrounding 100 kb window. Early RTDs  
931 were defined as regions where the average log-ratio  $> 1.6$  and late RTDs as regions

932 where the average log-ratio  $< -2.0$ . These thresholds resulted in 1648 early RTDs,  
933 ranging from 10 to 8940 kb in size, with a mean size of 591 kb, while we detected  
934 2046 late RTDs in sizes from 10 to 8860 kb, averaging at 470 kb. These RTDs were  
935 used to classify ChIP read relative frequencies calculated in 10 kb bins as early or late  
936 replication timing. Bins overlapping gene extended by 10 kb on both sides were  
937 removed from the analysis to avoid effects of gene activity on ChIP signals.

938

939 **Comparison of ChIP relative read frequencies distributions at different**  
940 **replication timing depending on transcriptional and replicative status**

941 All non-overlapping 10 kb windows were classified as intergenic if closest  
942 genes were more than 5 kb away, as belonging to a silent (resp. expressed) gene body  
943 if the window was inside a gene with  $\text{TPM} < 3$  (resp.  $\text{TPM} > 3$ ) and at more than 3 kb of  
944 gene borders, otherwise windows were disregarded. This made sure that specific ChIP  
945 signal at gene TSS and TTS were not considered in the analysis. Using the 3 window  
946 categories, we computed the 2D histograms of ChIP relative read frequencies vs  
947 replication timing in intergenic, silent and expressed gene bodies. We used 10 timing  
948 bins corresponding to the deciles of the whole genome timing distribution. For each  
949 timing bin, the histogram counts were normalized so as to obtain an estimate of the  
950 probability distribution function of the ChIP signal at the considered replication  
951 timing. The analysis was reproduced after restricting for windows fully in (i) AS  
952 segments (size  $> 20$  kb,  $\Delta\text{RFD} > 0.5$ ), (ii) DS segments (size  $> 20$  kb,  $\Delta\text{RFD} < -0.5$ ),  
953 (iii) URRs and (iv) NRRs.

954

955

956

957 **Statistics**

958 Statistical analyses were performed in R using one-sided t-test with Welch  
959 correction and 95% confidence interval or one-way ANOVA followed by Tukey's  
960 multiple comparisons of means with 95% family-wise confidence level, if  
961 appropriate. Comparison between ChIP signal distribution observed in two situations  
962 were performed computing the 2 sample Kolmogorov–Smirnov statistics  $D_{KS}$  using  
963 SciPy (v.1.5.0) statistical library and correcting for sample sizes by reporting  
964  $Z_{KS} = D_{KS}\sqrt{\frac{nm}{n+m}}$ , where  $n$  and  $m$  are the sizes of the two samples respectively.

965

966 **ERCE RFD profiles**

967 The position of the three genetically identified ERCEs in the mESC Dppa2/4  
968 locus and of the 1,835 predicted mESC ERCEs were downloaded from Sima et al.  
969 (Sima et al., 2019). The mESC OK-seq data were downloaded from Petryk et al.  
970 (Petryk et al., 2018), (SRR7535256), and mapped to mm10 genome Petryk et al.  
971 (Petryk et al., 2018). OK-seq data from cycling mouse B cells were downloaded from  
972 Tubbs et al. (Tubbs et al., 2018) (GSE116319). The RFD profile was computed as in  
973 Hennion et al., 2020 with 10kb binning steps. Predicted ERCE shuffling was  
974 performed using a homemade function keeping the number of ERCE constant for  
975 each chromosome and avoiding unmapped genome sequences (genome regions with  
976 more than 20 consecutives N). Aggregated average RFD profiles were centered on the  
977 ERCE and the profile's envelopes represent the CI95 based on the mean and standard  
978 deviation at each position.

979

980

981

982 **Data access**

983 Data have been deposited to the European Nucleotide Archive (ENA,  
984 <https://www.ebi.ac.uk/ena>). OK-seq data in Raji cells are available under the  
985 accession numbers PRJEB25180 (study accession) and SAMEA104651899 (sample  
986 accession, 5 replicates). Raji RNA-seq data are available under the accession number  
987 PRJEB31867 (study) and SAMEA5537240, SAMEA5537246, and SAMEA5537252  
988 (sample accession per replicate). Raji ChIP-seq data were deposited under the  
989 accession number PRJEB32855.

990

991

992 **Acknowledgements**

993 We thank Tobias Straub for initial help with bioinformatical analyses, Torsten  
994 Krude and Till Bartke for critical comments on the manuscript.  
995 A.S. was supported by the Deutsche Forschungsgemeinschaft (SFB 1064 TP05),  
996 SPP1230 and by the HELENA graduate school of the Helmholtz Zentrum München.  
997 B.A. and O.H were supported by the Agence Nationale de la Recherche (ANR-15-  
998 CE12-0011, ANR-18-CE45-0002, ANR-19-CE12-0028) and the Fondation pour la  
999 Recherche Médicale (FRM DEI201512344404), and the Cancéropôle Ile-de-France  
1000 and the INCa (PL-BIO16-302). O.H. was supported by the Ligue Nationale Contre le  
1001 Cancer (Comité de Paris), the Association pour la Recherche sur le Cancer, and the  
1002 program "Investissements d'Avenir" launched by the French Government and  
1003 implemented by the ANR (ANR-10-IDEX-0001-02 PSL\*Research University). W.H.  
1004 was supported by the Deutsche Forschungsgemeinschaft (SFB1064/TP A13, SFB-  
1005 TR36/TP A04), Deutsche Krebshilfe (grant number 70112875), and National Cancer  
1006 Institute (grant number CA70723).

1007

1008 **Author contributions**

1009 N.K. and A.S. designed and N.K. performed the majority of experiments;  
1010 A.B. performed the RNA-seq experiment and TPM analysis; X.W. performed OK-seq  
1011 experiments, S.K. and H.B. generated the sequencing library and sequencing, W.H.  
1012 designed RNA-seq experiments; O.H. developed OK-seq, B.A supervised  
1013 bioinformatic analyses; N.K. L.L. and B.A. performed bioinformatic analyses; A.S.  
1014 and OH proposed and designed the project and experimental systems; N.K., O.H. and  
1015 A.S. wrote the manuscript with comments from L.L. and B.A.; All the authors read  
1016 and approved the manuscript.

1017

1018 **Competing Interests statement**

1019 The authors declare no competing interests.

## 1020 References

- 1021 Adams, A., Lindahl, T., & Klein, G. (1973). Linear association between cellular DNA  
1022 and Epstein-Barr virus DNA in a human lymphoblastoid cell line. *Proc Natl*  
1023 *Acad Sci U S A*, 70(10), 2888-92. doi:10.1073/pnas.70.10.2888
- 1024 Almeida, R., Fernandez-Justel, J. M., Santa-Maria, C., Cadoret, J. C., Cano-Aroca, L.,  
1025 Lombrana, R., . . . Gomez, M. (2018). Chromatin conformation regulates the  
1026 coordination between DNA replication and transcription. *Nat Commun*, 9(1),  
1027 1590. doi:10.1038/s41467-018-03539-8
- 1028 Anders, S., Pyl, P. T., & Huber, W. (2015). HTSeq--a Python framework to work  
1029 with high-throughput sequencing data. *Bioinformatics*, 31(2), 166-9.  
1030 doi:10.1093/bioinformatics/btu638
- 1031 Audit, B., Baker, A., Chen, C. L., Rappailles, A., Guilbaud, G., Julienne, H., . . .  
1032 Arneodo, A. (2013). Multiscale analysis of genome-wide replication timing  
1033 profiles using a wavelet-based signal-processing algorithm. *Nat Protoc*, 8(1),  
1034 98-110. doi:10.1038/nprot.2012.145
- 1035 Baker, A., Audit, B., Chen, C. L., Moindrot, B., Leleu, A., Guilbaud, G., . . . Arneodo,  
1036 A. (2012). Replication fork polarity gradients revealed by megabase-sized U-  
1037 shaped replication timing domains in human cell lines. *PLoS Comput Biol*,  
1038 8(4), e1002443. doi:10.1371/journal.pcbi.1002443
- 1039 Beck, D. B., Oda, H., Shen, S. S., & Reinberg, D. (2012). PR-Set7 and H4K20me1: at  
1040 the crossroads of genome integrity, cell cycle, chromosome condensation, and  
1041 transcription. *Genes Dev*, 26(4), 325-37. doi:10.1101/gad.177444.111
- 1042 Bell, S. P., & Kaguni, J. M. (2013). Helicase loading at chromosomal origins of  
1043 replication. *Cold Spring Harb Perspect Biol*, 5(6).  
1044 doi:10.1101/cshperspect.a010124
- 1045 Benetti, R., Gonzalo, S., Jaco, I., Schotta, G., Klatt, P., Jenuwein, T., & Blasco, M. A.  
1046 (2007). Suv4-20h deficiency results in telomere elongation and derepression  
1047 of telomere recombination. *J Cell Biol*, 178(6), 925-36.  
1048 doi:10.1083/jcb.200703081
- 1049 Besnard, E., Babled, A., Lapasset, L., Milhavet, O., Parrinello, H., Dantec, C., . . .  
1050 Lemaitre, J. M. (2012). Unraveling cell type-specific and reprogrammable  
1051 human replication origin signatures associated with G-quadruplex consensus  
1052 motifs. *Nat Struct Mol Biol*, 19(8), 837-44. doi:10.1038/nsmb.2339
- 1053 Boos, D., & Ferreira, P. (2019). Origin Firing Regulations to Control Genome  
1054 Replication Timing. *Genes (Basel)*, 10(3). doi:10.3390/genes10030199
- 1055 Boulos, R. E., Drillon, G., Argoul, F., Arneodo, A., & Audit, B. (2015). Structural  
1056 organization of human replication timing domains. *FEBS Lett*, 589(20 Pt A),  
1057 2944-57. doi:10.1016/j.febslet.2015.04.015
- 1058 Brustel, J., Kirstein, N., Izard, F., Grimaud, C., Prorok, P., Cayrou, C., . . . Julien, E.  
1059 (2017). Histone H4K20 tri-methylation at late-firing origins ensures timely  
1060 heterochromatin replication. *EMBO J*, 36(18), 2726-41.  
1061 doi:10.15252/embj.201796541
- 1062 Cayrou, C., Ballester, B., Peiffer, I., Fenouil, R., Coulombe, P., Andrau, J. C., . . .  
1063 Mechali, M. (2015). The chromatin environment shapes DNA replication  
1064 origin organization and defines origin classes. *Genome Res*, 25(12), 1873-85.  
1065 doi:10.1101/gr.192799.115
- 1066 Cayrou, C., Coulombe, P., Vigneron, A., Stanojcic, S., Ganier, O., Peiffer, I., . . .  
1067 Mechali, M. (2011). Genome-scale analysis of metazoan replication origins

- 1068 reveals their organization in specific but flexible sites defined by conserved  
1069 features. *Genome Res*, 21(9), 1438-49. doi:10.1101/gr.121830.111
- 1070 Chen, Y. H., Keegan, S., Kahli, M., Tonzi, P., Fenyo, D., Huang, T. T., & Smith, D. J.  
1071 (2019). Transcription shapes DNA replication initiation and termination in  
1072 human cells. *Nat Struct Mol Biol*, 26(1), 67-77. doi:10.1038/s41594-018-  
1073 0171-0
- 1074 Das, S. P., Borrman, T., Liu, V. W., Yang, S. C., Bechhoefer, J., & Rhind, N. (2015).  
1075 Replication timing is regulated by the number of MCMs loaded at origins.  
1076 *Genome Res*, 25(12), 1886-92. doi:10.1101/gr.195305.115
- 1077 Dellino, G. I., Cittaro, D., Piccioni, R., Luzi, L., Banfi, S., Segalla, S., . . . Pelicci, P.  
1078 G. (2013). Genome-wide mapping of human DNA-replication origins: levels  
1079 of transcription at ORC1 sites regulate origin selection and replication timing.  
1080 *Genome Res*, 23(1), 1-11. doi:10.1101/gr.142331.112
- 1081 Demczuk, A., Gauthier, M. G., Veras, I., Kosiyatrakul, S., Schildkraut, C. L.,  
1082 Busslinger, M., . . . Norio, P. (2012). Regulation of DNA replication within  
1083 the immunoglobulin heavy-chain locus during B cell commitment. *PLoS Biol*,  
1084 10(7), e1001360. doi:10.1371/journal.pbio.1001360
- 1085 Douglas, M. E., Ali, F. A., Costa, A., & Diffley, J. F. X. (2018). The mechanism of  
1086 eukaryotic CMG helicase activation. *Nature*, 555(7695), 265-68.  
1087 doi:10.1038/nature25787
- 1088 Evrin, C., Clarke, P., Zech, J., Lurz, R., Sun, J., Uhle, S., . . . Speck, C. (2009). A  
1089 double-hexameric MCM2-7 complex is loaded onto origin DNA during  
1090 licensing of eukaryotic DNA replication. *Proc Natl Acad Sci U S A*, 106(48),  
1091 20240-5. doi:0911500106 [pii]  
1092 10.1073/pnas.0911500106
- 1093 Feng, J., Liu, T., Qin, B., Zhang, Y., & Liu, X. S. (2012). Identifying ChIP-seq  
1094 enrichment using MACS. *Nat Protoc*, 7(9), 1728-40.  
1095 doi:10.1038/nprot.2012.101
- 1096 Fragkos, M., Ganier, O., Coulombe, P., & Mechali, M. (2015). DNA replication  
1097 origin activation in space and time. *Nat Rev Mol Cell Biol*, 16(6), 360-74.  
1098 doi:10.1038/nrm4002
- 1099 Gros, J., Kumar, C., Lynch, G., Yadav, T., Whitehouse, I., & Remus, D. (2015). Post-  
1100 licensing Specification of Eukaryotic Replication Origins by Facilitated  
1101 Mcm2-7 Sliding along DNA. *Mol Cell*, 60(5), 797-807.  
1102 doi:10.1016/j.molcel.2015.10.022
- 1103 Guilbaud, G., Rappailles, A., Baker, A., Chen, C. L., Arneodo, A., Goldar, A., . . .  
1104 Hyrien, O. (2011). Evidence for sequential and increasing activation of  
1105 replication origins along replication timing gradients in the human genome.  
1106 *PLoS Comput Biol*, 7(12), e1002322. doi:10.1371/journal.pcbi.1002322
- 1107 Hadjadj, D., Denecker, T., Maric, C., Fauchereau, F., Baldacci, G., & Cadoret, J. C.  
1108 (2016). Characterization of the replication timing program of 6 human model  
1109 cell lines. *Genom Data*, 9, 113-7. doi:10.1016/j.gdata.2016.07.003
- 1110 Hamlin, J. L., Mesner, L. D., & Dijkwel, P. A. (2010). A winding road to origin  
1111 discovery. *Chromosome Res*, 18(1), 45-61. doi:10.1007/s10577-009-9089-z
- 1112 Hennion, M., Arbona, J. M., Lacroix, L., Cruaud, C., Theulot, B., Tallec, B. L., . . .  
1113 Hyrien, O. (2020). FORK-seq: replication landscape of the *Saccharomyces*  
1114 *cerevisiae* genome by nanopore sequencing. *Genome Biol*, 21(1), 125.  
1115 doi:10.1186/s13059-020-02013-3



- 1116 Hulke, M. L., Massey, D. J., & Koren, A. (2020). Genomic methods for measuring  
1117 DNA replication dynamics. *Chromosome Res*, 28(1), 49-67.  
1118 doi:10.1007/s10577-019-09624-y
- 1119 Hyrien, O. (2016). How MCM loading and spreading specify eukaryotic DNA  
1120 replication initiation sites. *F1000Res*, 5. doi:10.12688/f1000research.9008.1
- 1121 Hyrien, O., Maric, C., & Mechali, M. (1995). Transition in specification of embryonic  
1122 metazoan DNA replication origins. *Science*, 270, 994-97.
- 1123 Jorgensen, S., Schotta, G., & Sorensen, C. S. (2013). Histone H4 lysine 20  
1124 methylation: key player in epigenetic regulation of genomic integrity. *Nucleic  
1125 Acids Res*, 41(5), 2797-806. doi:10.1093/nar/gkt012
- 1126 Kent, W. J., Sugnet, C. W., Furey, T. S., Roskin, K. M., Pringle, T. H., Zahler, A. M.,  
1127 & Haussler, D. (2002). The human genome browser at UCSC. *Genome Res*,  
1128 12(6), 996-1006. doi:10.1101/gr.229102
- 1129 Kim, D., Pertea, G., Trapnell, C., Pimentel, H., Kelley, R., & Salzberg, S. L. (2013).  
1130 TopHat2: accurate alignment of transcriptomes in the presence of insertions,  
1131 deletions and gene fusions. *Genome Biol*, 14(4), R36. doi:10.1186/gb-2013-  
1132 14-4-r36
- 1133 Knott, S. R., Viggiani, C. J., & Aparicio, O. M. (2009). To promote and protect:  
1134 coordinating DNA replication and transcription for genome stability.  
1135 *Epigenetics*, 4(6), 362-5. doi:10.4161/epi.4.6.9712
- 1136 Langley, A. R., Graf, S., Smith, J. C., & Krude, T. (2016). Genome-wide  
1137 identification and characterisation of human DNA replication origins by  
1138 initiation site sequencing (ini-seq). *Nucleic Acids Res*.  
1139 doi:10.1093/nar/gkw760
- 1140 Langmead, B., Trapnell, C., Pop, M., & Salzberg, S. L. (2009). Ultrafast and  
1141 memory-efficient alignment of short DNA sequences to the human genome.  
1142 *Genome Biol*, 10(3), R25. doi:10.1186/gb-2009-10-3-r25
- 1143 Lebofsky, R., Heilig, R., Sonnleitner, M., Weissenbach, J., & Bensimon, A. (2006).  
1144 DNA replication origin interference increases the spacing between initiation  
1145 events in human cells. *Mol Biol Cell*, 17(12), 5337-45. doi:10.1091/mbc.e06-  
1146 04-0298
- 1147 Li, H., & Durbin, R. (2009). Fast and accurate short read alignment with Burrows-  
1148 Wheeler transform. *Bioinformatics*, 25(14), 1754-60.  
1149 doi:10.1093/bioinformatics/btp324
- 1150 MacAlpine, H. K., Gordan, R., Powell, S. K., Hartemink, A. J., & MacAlpine, D. M.  
1151 (2010). Drosophila ORC localizes to open chromatin and marks sites of  
1152 cohesin complex loading. *Genome Res*, 20(2), 201-11. doi:gr.097873.109 [pii]  
1153 10.1101/gr.097873.109
- 1154 Macheret, M., & Halazonetis, T. D. (2018). Intragenic origins due to short G1 phases  
1155 underlie oncogene-induced DNA replication stress. *Nature*, 555(7694), 112-  
1156 16. doi:10.1038/nature25507
- 1157 Marahrens, Y., & Stillman, B. (1992). A yeast chromosomal origin of DNA  
1158 replication defined by multiple functional elements. *Science*, 255, 817-23.
- 1159 Marchal, C., Sima, J., & Gilbert, D. M. (2019). Control of DNA replication timing in  
1160 the 3D genome. *Nat Rev Mol Cell Biol*, 20(12), 721-37. doi:10.1038/s41580-  
1161 019-0162-y
- 1162 Martin, M. M., Ryan, M., Kim, R., Zakas, A. L., Fu, H., Lin, C. M., . . . Aladjem, M.  
1163 I. (2011). Genome-wide depletion of replication initiation events in highly  
1164 transcribed regions. *Genome Res*, 21(11), 1822-32. doi:10.1101/gr.124644.111

- 1165 McGuffee, S. R., Smith, D. J., & Whitehouse, I. (2013). Quantitative, genome-wide  
1166 analysis of eukaryotic replication initiation and termination. *Mol Cell*, *50*(1),  
1167 123-35. doi:10.1016/j.molcel.2013.03.004
- 1168 Mesner, L. D., Valsakumar, V., Cieslik, M., Pickin, R., Hamlin, J. L., & Bekiranov, S.  
1169 (2013). Bubble-seq analysis of the human genome reveals distinct chromatin-  
1170 mediated mechanisms for regulating early- and late-firing origins. *Genome*  
1171 *Res*, *23*(11), 1774-88. doi:10.1101/gr.155218.113
- 1172 Miotto, B., Ji, Z., & Struhl, K. (2016). Selectivity of ORC binding sites and the  
1173 relation to replication timing, fragile sites, and deletions in cancers. *Proc Natl*  
1174 *Acad Sci U S A*, *113*(33), E4810-9. doi:10.1073/pnas.1609060113
- 1175 Moiseeva, T. N., & Bakkenist, C. J. (2018). Regulation of the initiation of DNA  
1176 replication in human cells. *DNA Repair (Amst)*, *72*, 99-106.  
1177 doi:10.1016/j.dnarep.2018.09.003
- 1178 Muller, C. A., Boemo, M. A., Spingardi, P., Kessler, B. M., Kriaucionis, S., Simpson,  
1179 J. T., & Nieduszynski, C. A. (2019). Capturing the dynamics of genome  
1180 replication on individual ultra-long nanopore sequence reads. *Nat Methods*,  
1181 *16*(5), 429-36. doi:10.1038/s41592-019-0394-y
- 1182 Nakamura, K., Saredi, G., Becker, J. R., Foster, B. M., Nguyen, N. V., Beyer, T. E., . . .  
1183 . Groth, A. (2019). H4K20me0 recognition by BRCA1-BARD1 directs  
1184 homologous recombination to sister chromatids. *Nat Cell Biol*, *21*(3), 311-18.  
1185 doi:10.1038/s41556-019-0282-9
- 1186 Norio, P., & Schildkraut, C. L. (2001). Visualization of DNA replication on  
1187 individual Epstein-Barr virus episomes. *Science*, *294*(5550), 2361-64.
- 1188 Norio, P., & Schildkraut, C. L. (2004). Plasticity of DNA replication initiation in  
1189 Epstein-Barr virus episomes. *PLoS Biol*, *2*(6), e152.
- 1190 Pannetier, M., Julien, E., Schotta, G., Tardat, M., Sardet, C., Jenuwein, T., & Feil, R.  
1191 (2008). PR-SET7 and SUV4-20H regulate H4 lysine-20 methylation at  
1192 imprinting control regions in the mouse. *EMBO Rep*, *9*(10), 998-1005.  
1193 doi:10.1038/embor.2008.147
- 1194 Papior, P., Arteaga-Salas, J. M., Gunther, T., Grundhoff, A., & Schepers, A. (2012).  
1195 Open chromatin structures regulate the efficiencies of pre-RC formation and  
1196 replication initiation in Epstein-Barr virus. *J Cell Biol*, *198*(4), 509-28.  
1197 doi:10.1083/jcb.201109105
- 1198 Petryk, N., Dalby, M., Wenger, A., Stromme, C. B., Strandsby, A., Andersson, R., &  
1199 Groth, A. (2018). MCM2 promotes symmetric inheritance of modified  
1200 histones during DNA replication. *Science*, *361*(6409), 1389-92.  
1201 doi:10.1126/science.aau0294
- 1202 Petryk, N., Kahli, M., d'Aubenton-Carafa, Y., Jaszczyszyn, Y., Shen, Y., Silvain, M.,  
1203 . . . Hyrien, O. (2016). Replication landscape of the human genome. *Nat*  
1204 *Commun*, *7*, 10208. doi:10.1038/ncomms10208
- 1205 Picard, F., Cadoret, J. C., Audit, B., Arneodo, A., Alberti, A., Battail, C., . . . Prioleau,  
1206 M. N. (2014). The spatiotemporal program of DNA replication is associated  
1207 with specific combinations of chromatin marks in human cells. *PLoS Genet*,  
1208 *10*(5), e1004282. doi:10.1371/journal.pgen.1004282
- 1209 Pope, B. D., Ryba, T., Dileep, V., Yue, F., Wu, W., Denas, O., . . . Gilbert, D. M.  
1210 (2014). Topologically associating domains are stable units of replication-  
1211 timing regulation. *Nature*, *515*(7527), 402-5. doi:10.1038/nature13986
- 1212 Powell, S. K., MacAlpine, H. K., Prinz, J. A., Li, Y., Belsky, J. A., & MacAlpine, D.  
1213 M. (2015). Dynamic loading and redistribution of the Mcm2-7 helicase

- 1214 complex through the cell cycle. *EMBO J*, 34(4), 531-43.  
1215 doi:10.15252/embj.201488307
- 1216 Prioleau, M. N., & MacAlpine, D. M. (2016). DNA replication origins-where do we  
1217 begin? *Genes Dev*, 30(15), 1683-97. doi:10.1101/gad.285114.116
- 1218 R\_Core\_Team. (2018). R: A language and environment for statistical computing. R  
1219 Foundation for Statistical Computin. Retrieved from [https://www.R-](https://www.R-project.org)  
1220 [project.org](https://www.R-project.org)
- 1221 Ramirez, F., Dundar, F., Diehl, S., Gruning, B. A., & Manke, T. (2014). deepTools: a  
1222 flexible platform for exploring deep-sequencing data. *Nucleic Acids Res*,  
1223 42(Web Server issue), W187-91. doi:10.1093/nar/gku365
- 1224 Remus, D., & Diffley, J. F. (2009). Eukaryotic DNA replication control: lock and  
1225 load, then fire. *Curr Opin Cell Biol*, 21(6), 771-7. doi:S0955-0674(09)00152-5  
1226 [pii]  
1227 10.1016/j.ceb.2009.08.002
- 1228 Rhind, N., & Gilbert, D. M. (2013). DNA replication timing. *Cold Spring Harb*  
1229 *Perspect Biol*, 3(7), 1-26. doi:10.1101/cshperspect.a010132
- 1230 Ritzi, M., Tillack, K., Gerhardt, J., Ott, E., Humme, S., Kremmer, E., . . . Schepers, A.  
1231 (2003). Complex Protein-DNA Dynamics at the Latent Origin of DNA  
1232 Replication of Epstein-Barr Virus. *J Cell Sci*, 116, 3971-84.
- 1233 Rivera-Mulia, J. C., & Gilbert, D. M. (2016a). Replicating Large Genomes: Divide  
1234 and Conquer. *Mol Cell*, 62(5), 756-65. doi:10.1016/j.molcel.2016.05.007
- 1235 Rivera-Mulia, J. C., & Gilbert, D. M. (2016b). Replication timing and transcriptional  
1236 control: beyond cause and effect-part III. *Curr Opin Cell Biol*, 40, 168-78.  
1237 doi:10.1016/j.ceb.2016.03.022
- 1238 Ryba, T., Hiratani, I., Lu, J., Itoh, M., Kulik, M., Zhang, J., . . . Gilbert, D. M. (2010).  
1239 Evolutionarily conserved replication timing profiles predict long-range  
1240 chromatin interactions and distinguish closely related cell types. *Genome Res*,  
1241 20(6), 761-70. doi:10.1101/gr.099655.109
- 1242 Sasaki, T., Ramanathan, S., Okuno, Y., Kumagai, C., Shaikh, S. S., & Gilbert, D. M.  
1243 (2006). The Chinese hamster dihydrofolate reductase replication origin  
1244 decision point follows activation of transcription and suppresses initiation of  
1245 replication within transcription units. *Mol Cell Biol*, 26(3), 1051-62.  
1246 doi:10.1128/MCB.26.3.1051-1062.2006
- 1247 Schepers, A., Ritzi, M., Bousset, K., Kremmer, E., Yates, J. L., Harwood, J., . . .  
1248 Hammerschmidt, W. (2001). Human origin recognition complex binds to the  
1249 region of the latent origin of DNA replication of Epstein-Barr virus. *EMBO J*,  
1250 20(16), 4588-602.
- 1251 Schwartz, Y. B., Kahn, T. G., & Pirrotta, V. (2005). Characteristic low density and  
1252 shear sensitivity of cross-linked chromatin containing polycomb complexes.  
1253 *Mol Cell Biol*, 25(1), 432-9. doi:10.1128/MCB.25.1.432-439.2005
- 1254 Shoaib, M., Walter, D., Gillespie, P. J., IZard, F., Fahrenkrog, B., Lleres, D., . . .  
1255 Sorensen, C. S. (2018). Histone H4K20 methylation mediated chromatin  
1256 compaction threshold ensures genome integrity by limiting DNA replication  
1257 licensing. *Nat Commun*, 9(1), 3704. doi:10.1038/s41467-018-06066-8
- 1258 Sima, J., Bartlett, D. A., Gordon, M. R., & Gilbert, D. M. (2018). Bacterial artificial  
1259 chromosomes establish replication timing and sub-nuclear compartment de  
1260 novo as extra-chromosomal vectors. *Nucleic Acids Res*, 46(4), 1810-20.  
1261 doi:10.1093/nar/gkx1265
- 1262 Sima, J., Chakraborty, A., Dileep, V., Michalski, M., Klein, K. N., Holcomb, N. P., . . .  
1263 . Gilbert, D. M. (2019). Identifying cis Elements for Spatiotemporal Control of

- 1264 Mammalian DNA Replication. *Cell*, 176(4), 816-30 e18.  
1265 doi:10.1016/j.cell.2018.11.036
- 1266 Smith, D. J., & Whitehouse, I. (2012). Intrinsic coupling of lagging-strand synthesis  
1267 to chromatin assembly. *Nature*, 483(7390), 434-8. doi:10.1038/nature10895
- 1268 Smith, O. K., & Aladjem, M. I. (2014). Chromatin structure and replication origins:  
1269 Determinants of chromosome replication and nuclear organization. *J Mol Biol*,  
1270 426(20), 3330-41. doi:10.1016/j.jmb.2014.05.027
- 1271 Sugimoto, N., Maehara, K., Yoshida, K., Ohkawa, Y., & Fujita, M. (2018). Genome-  
1272 wide analysis of the spatiotemporal regulation of firing and dormant  
1273 replication origins in human cells. *Nucleic Acids Res*, 46(13), 6683-96.  
1274 doi:10.1093/nar/gky476
- 1275 Takahashi, T. S., Wigley, D. B., & Walter, J. C. (2005). Pumps, paradoxes and  
1276 ploughshares: mechanism of the MCM2-7 DNA helicase. *Trends Biochem Sci*,  
1277 30(8), 437-44. doi:10.1016/j.tibs.2005.06.007
- 1278 Tardat, M., Brustel, J., Kirsh, O., Lefevbre, C., Callanan, M., Sardet, C., & Julien, E.  
1279 (2010). The histone H4 Lys 20 methyltransferase PR-Set7 regulates  
1280 replication origins in mammalian cells. *Nat Cell Biol*, 12(11), 1086-93.  
1281 doi:10.1038/ncb2113
- 1282 Teytelman, L., Ozaydin, B., Zill, O., Lefrancois, P., Snyder, M., Rine, J., & Eisen, M.  
1283 B. (2009). Impact of chromatin structures on DNA processing for genomic  
1284 analyses. *PLoS One*, 4(8), e6700. doi:10.1371/journal.pone.0006700
- 1285 Thurman, R. E., Rynes, E., Humbert, R., Vierstra, J., Maurano, M. T., Haugen, E., . . .  
1286 Stamatoyannopoulos, J. A. (2012). The accessible chromatin landscape of the  
1287 human genome. *Nature*, 489(7414), 75-82. doi:10.1038/nature11232
- 1288 Tubbs, A., Sridharan, S., van Wietmarschen, N., Maman, Y., Callen, E., Stanlie, A., .  
1289 . . Nussenzweig, A. (2018). Dual Roles of Poly(dA:dT) Tracts in Replication  
1290 Initiation and Fork Collapse. *Cell*, 174(5), 1127-42 e19.  
1291 doi:10.1016/j.cell.2018.07.011
- 1292 Wagner, G. P., Kin, K., & Lynch, V. J. (2012). Measurement of mRNA abundance  
1293 using RNA-seq data: RPKM measure is inconsistent among samples. *Theory*  
1294 *Biosci*, 131(4), 281-5. doi:10.1007/s12064-012-0162-3
- 1295 Wu, X., Kabalane, H., Kahli, M., Petryk, N., Laperrousaz, B., Jaszczyszyn, Y., . . .  
1296 Hyrien, O. (2018). Developmental and cancer-associated plasticity of DNA  
1297 replication preferentially targets GC-poor, lowly expressed and late-  
1298 replicating regions. *Nucleic Acids Res*, 46(19), 10157-72.  
1299 doi:10.1093/nar/gky797
- 1300 Yang, S. C., Rhind, N., & Bechhoefer, J. (2010). Modeling genome-wide replication  
1301 kinetics reveals a mechanism for regulation of replication timing. *Mol Syst*  
1302 *Biol*, 6, 404. doi:10.1038/msb.2010.61
- 1303 Zhang, Y., Liu, T., Meyer, C. A., Eeckhoute, J., Johnson, D. S., Bernstein, B. E., . . .  
1304 Liu, X. S. (2008). Model-based analysis of ChIP-Seq (MACS). *Genome Biol*,  
1305 9(9), R137. doi:10.1186/gb-2008-9-9-r137
- 1306 Zhao, P. A., Rivera-Mulia, J. C., & Gilbert, D. M. (2017). Replication Domains:  
1307 Genome Compartmentalization into Functional Replication Units. *Adv Exp*  
1308 *Med Biol*, 1042, 229-57. doi:10.1007/978-981-10-6955-0\_11
- 1309 Zhao, P. A., Sasaki, T., & Gilbert, D. M. (2020). High-resolution Repli-Seq defines  
1310 the temporal choreography of initiation, elongation and termination of  
1311 replication in mammalian cells. *Genome Biol*, 21(1), 76. doi:10.1186/s13059-  
1312 020-01983-8  
1313

1314 **SUPPLEMENTARY MATERIAL**

1315 **Supplementary Figure 1**

1316 **Supplementary Figure 2**

1317 **Supplementary Figure 3**

1318 **Supplementary Figure 4**

1319 **Supplementary Figure 5**

1320 **Supplementary Figure 6**

1321 **Supplementary Figure 7**

1322 **Supplementary Figure 8**

1323 **Supplementary Figure 9**

1324 **Supplementary Figure 10**

1325

1326 **Supplementary Table 1**

1327 **Supplementary Table 2**

1328 **Supplementary Table 3**

1329 **Supplementary Figure 1**

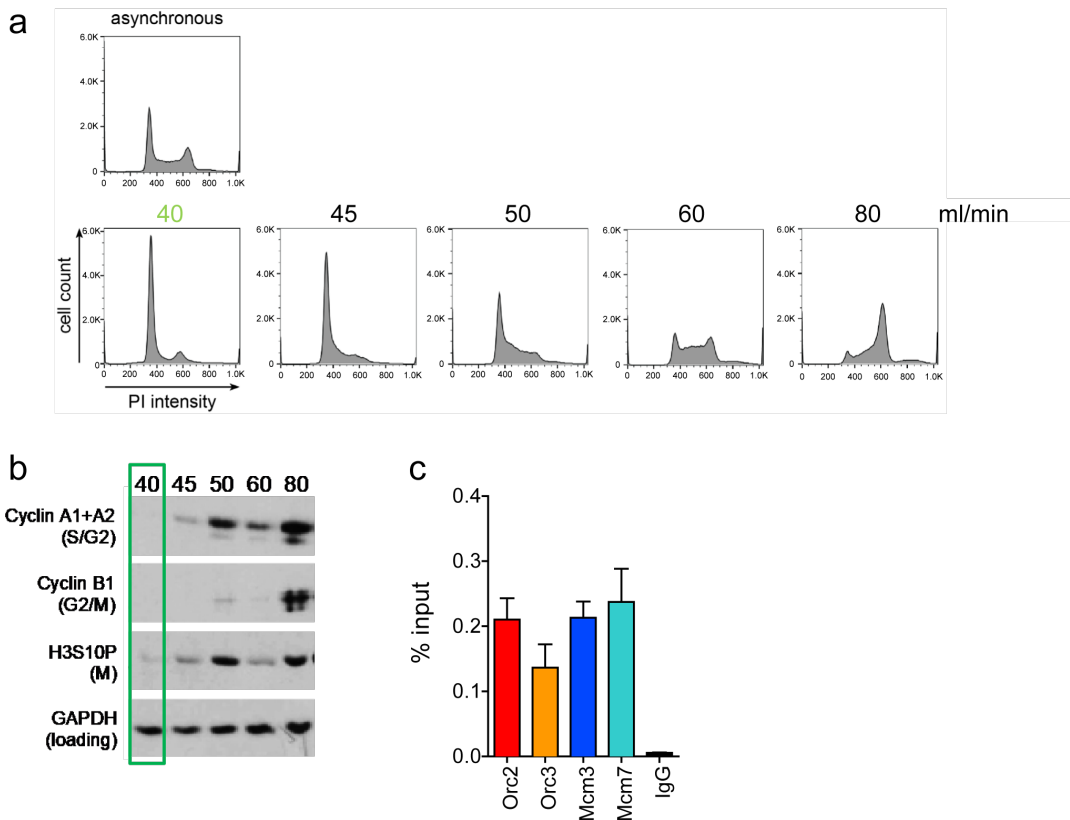

1330

1331 Supplementary Figure 1: Experimental validation of cell cycle fractionation and ORC/MCM  
1332 ChIP quality.

1333 a) Example DNA content (Propidium Iodide) staining followed by FACS of logarithmically  
1334 growing Raji (top) cells after cell cycle fractionation by centrifugal elutriation (increasing  
1335 counter flow rates indicated above each profile). b) Western Blot analyses of the single  
1336 fractions detecting Cyclin A (S/G2), Cyclin B (G2/M), H3S10P (M) and GAPDH. c) qPCR  
1337 validation of Orc2, Orc3, Mcm3 and Mcm7 enrichment at the EBV latent origin oriP dyad  
1338 symmetry element. Representation in % input. Isotype IgG was used as control.  
1339

1340 **Supplementary Figure 2**

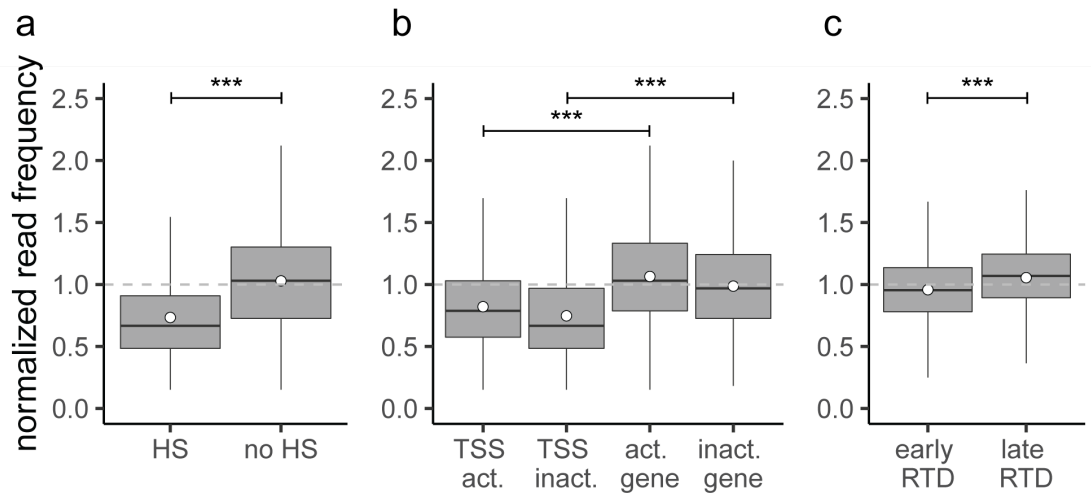

1341

1342 Supplementary Figure 2: The input sequencing control is differentially represented in regions  
1343 of biological function.

1344 Boxplot of normalized input read frequencies in relation to a) DNase hypersensitivity. DNase  
1345 HS clusters were obtained from 125 cell lines in ENCODE, only HS sites larger 1 kb were  
1346 considered. b) transcription: TSSs and gene body of active (TPM > 3) and inactive (TPM < 3)  
1347 genes, and c) early or late replication timing domains (RTDs). The dashed grey horizontal  
1348 line indicates read frequency 1.0 for orientation. Boxplot represent the mean (circle), the  
1349 median (thick line), the 1st and 3rd quartile (box), the 1st and 9th decile (whiskers) of the  
1350 relative read frequencies, without representing outliers. Statistics were performed using one-  
1351 sided t-test. \*  $p < 0.05$ , \*\*  $p < 0.01$ , \*\*\*  $p < 0.001$ .

1352

1353 **Supplementary Figure 3**

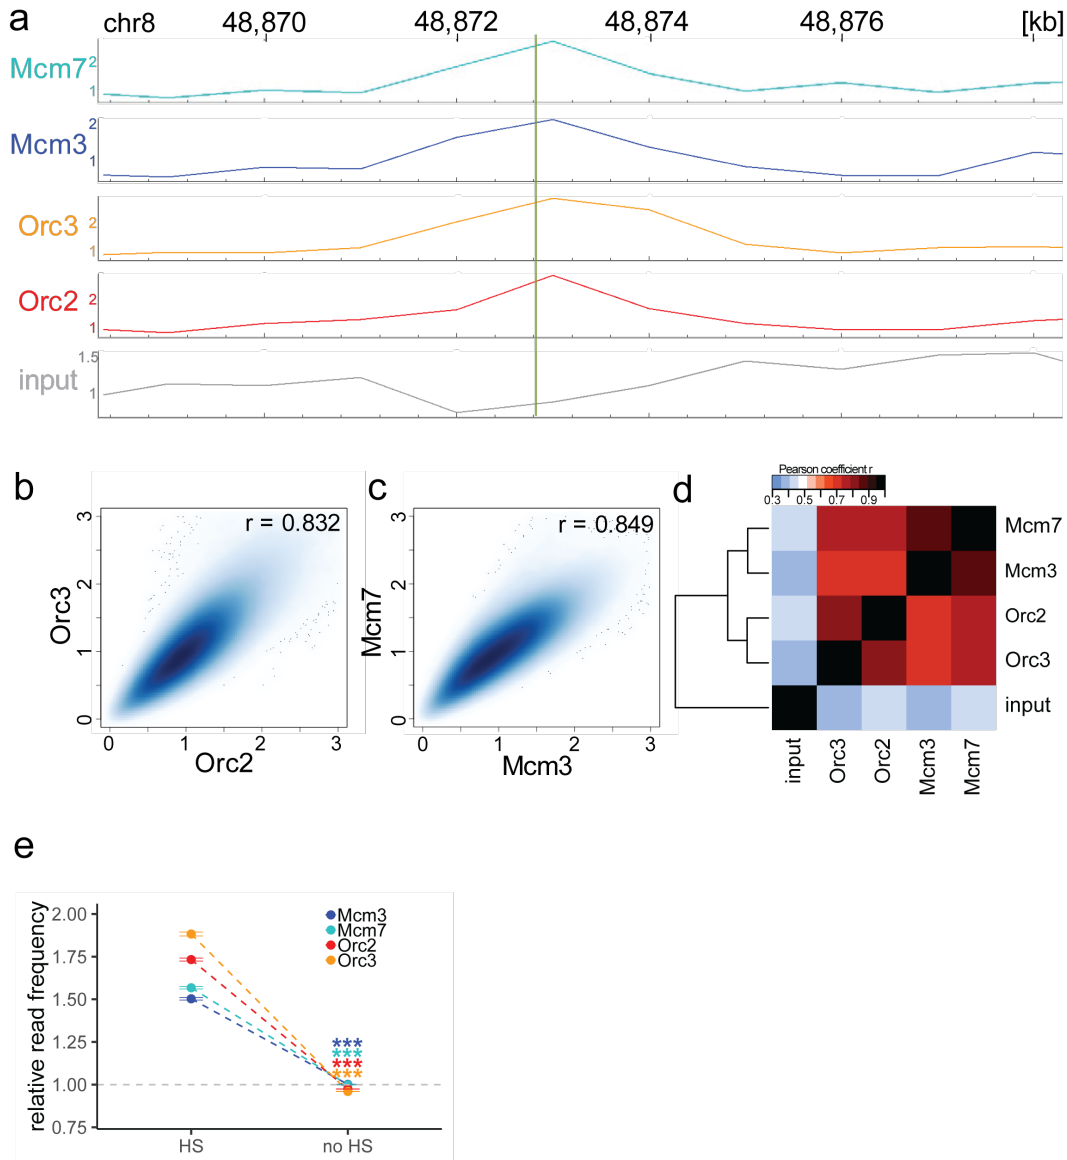

1354

1355 Supplementary Figure 3: ORC/MCM enrichment at the MCM4/PRKDC origin persists  
1356 without input normalization. a) The profile of ORC/MCM ChIP-seq after 1 kb binning in the  
1357 same 10 kb window as Figure 1b (chr8: 48,868,314 - 48,878,313). The reads of replicates  
1358 were summed and normalized by the total genome-wide ChIP read frequency. Y-axis  
1359 represents the resulting normalized read frequency. b) Correlation plot between Orc2 and  
1360 Orc3 normalized read frequencies in 1 kb bins. c) Correlation plot between Mcm3 and Mcm7  
1361 normalized read frequencies in 1 kb bins. d) Heatmap of Pearson correlation coefficients  $r$   
1362 between all ChIP normalized read frequencies including input in 1 kb bins. Column and line  
1363 order were determined by complete linkage hierarchical clustering using the correlation  
1364 distance ( $d = 1-r$ ). e) ORC/MCM binding is confirmed at DNase HS sites: mean input-  
1365 normalized ORC/MCM relative read frequencies ( $\pm 2 \times \text{SEM}$ ) in relation to DNase  
1366 hypersensitivity. Only HS sites larger 1 kb were considered. Statistics were performed using  
1367 one-sided t-test. \*\*\*  $p < 0.001$ .



1368 **Supplementary Figure 4**

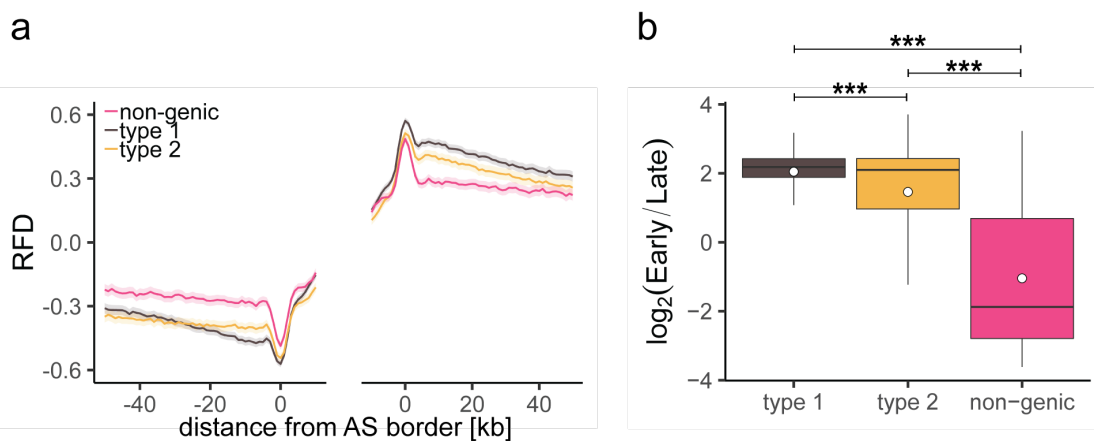

1369

1370 Supplementary Figure 4: Characterization of different AS types.

1371 a) Average RFD of different AS types plotted at AS borders  $\pm 2 \times \text{SEM}$  (lighter shadows). b)

1372 Replication timing ratio  $\log_2(\text{Early/Late})$  was assigned to type 1, type 2, and non-genic AS

1373 and represented as boxplot. Boxplot represent the mean (circle), the median (thick line), the

1374 1st and 3rd quartile (box), the 1st and 9th decile (whiskers) of the relative read frequencies,

1375 without representing outliers. Statistics were performed by one-way ANOVA followed by

1376 Tukey's post-hoc test. \*\*\*  $p < 0.001$ .

1377

1378 **Supplementary Figure 5**

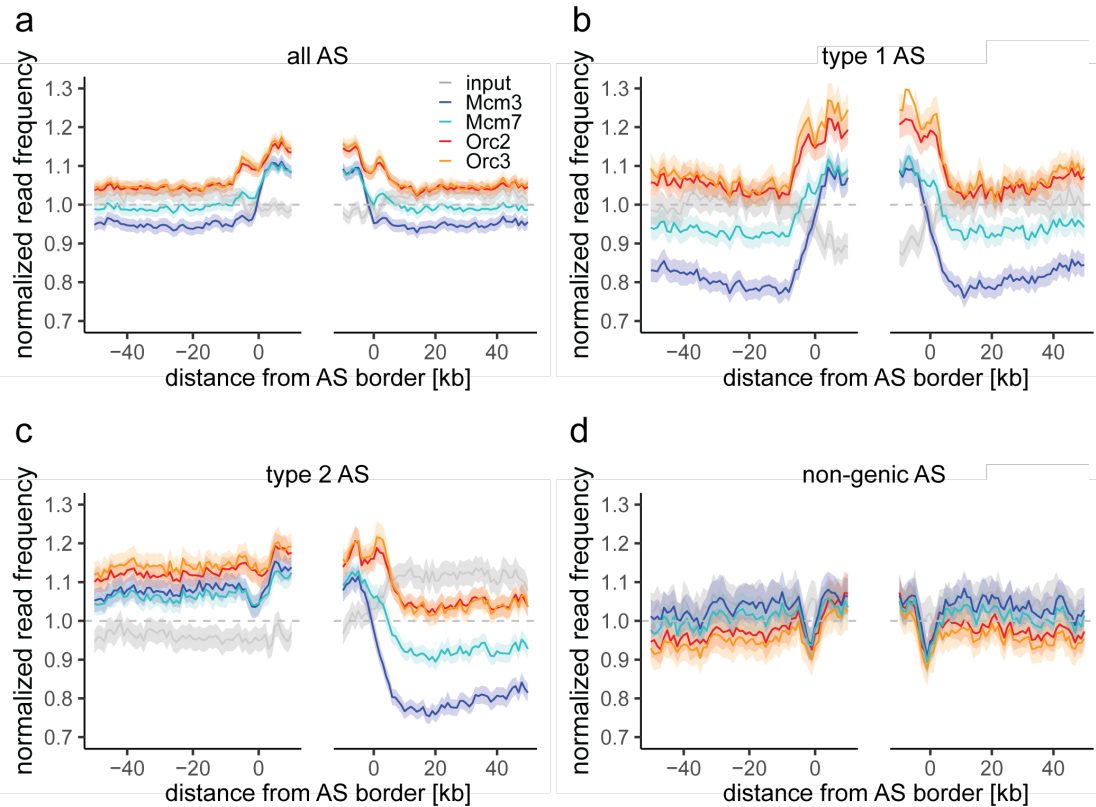

1379

1380 Supplementary Figure 5: ORC/MCM enrichment within AS without input normalization.  
1381 a-d) Average ChIP normalized read frequencies of Orc2, Orc3, Mcm3, Mcm7, and input at  
1382 AS borders of b) all ASs (n = 2957), c) type 1 ASs with transcribed genes at both ASs borders  
1383 (n = 673), d) type 2 ASs with transcribed genes oriented at their right ASs border (n = 1026),  
1384 and e) non-genic ASs in gene deprived regions (n = 506). The mean of normalized read  
1385 frequencies is shown  $\pm 2 \times$  SEM (lighter shadows). The dashed grey horizontal line indicates  
1386 read frequency 1.0 for reference.  
1387

1388 **Supplementary Figure 6**

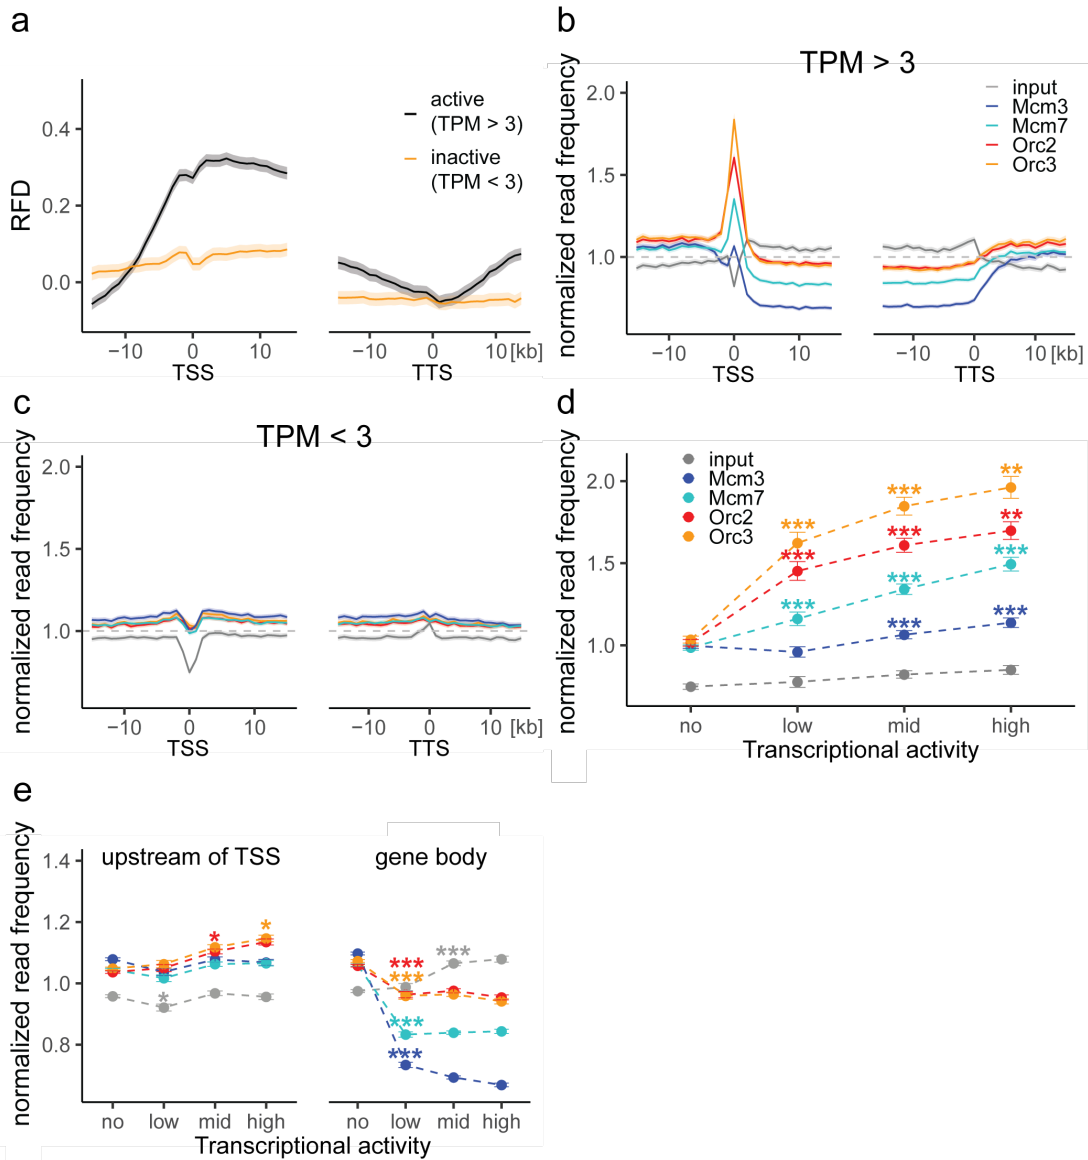

1389

1390 Supplementary Figure 6: ORC and MCM profiles at genes without input normalization.  
 1391 a) RFD around TSSs or TTSs of active genes (black) or inactive genes (yellow). Distances  
 1392 from TSSs or TTSs are indicated in kb. RFD means are shown  $\pm 2 \times$  SEM (lighter shadows).  
 1393 b - c) Normalized ORC/MCM/input read frequencies without input division around TSSs or  
 1394 TTSs for b) active genes (TPM > 3) and c) inactive genes (TPM < 3). Only genes larger than  
 1395 30 kb without any adjacent gene within 15 kb were considered. Distances from TSSs or TTSs  
 1396 are indicated in kb. Means of normalized read frequencies are shown  $\pm 2 \times$  SEM (lighter  
 1397 shadows). The dashed grey horizontal line indicates read frequency 1.0 for reference. d)  
 1398 Normalized ORC/MCM/input read frequencies at TSSs dependent on transcriptional activity  
 1399 ( $\pm 2 \times$  SEM). e) Normalized ORC/MCM/input read frequencies upstream of TSSs and in the  
 1400 gene body dependent on transcriptional activity ( $\pm 2 \times$  SEM; TSSs  $\pm 3$  kb removed from  
 1401 analysis). Transcriptional activity was classified as: no (TPM < 3), low (TPM 3-10), mid  
 1402 (TPM 10-40), high (TPM > 40). Statistics were performed by one-way ANOVA followed by  
 1403 Tukey's post-hoc test. P-values are indicated always comparing to the previous transcriptional  
 1404 level. \*  $p < 0.05$ , \*\*  $p < 0.01$ , \*\*\*  $p < 0.001$ .

1405 **Supplementary Figure 7**

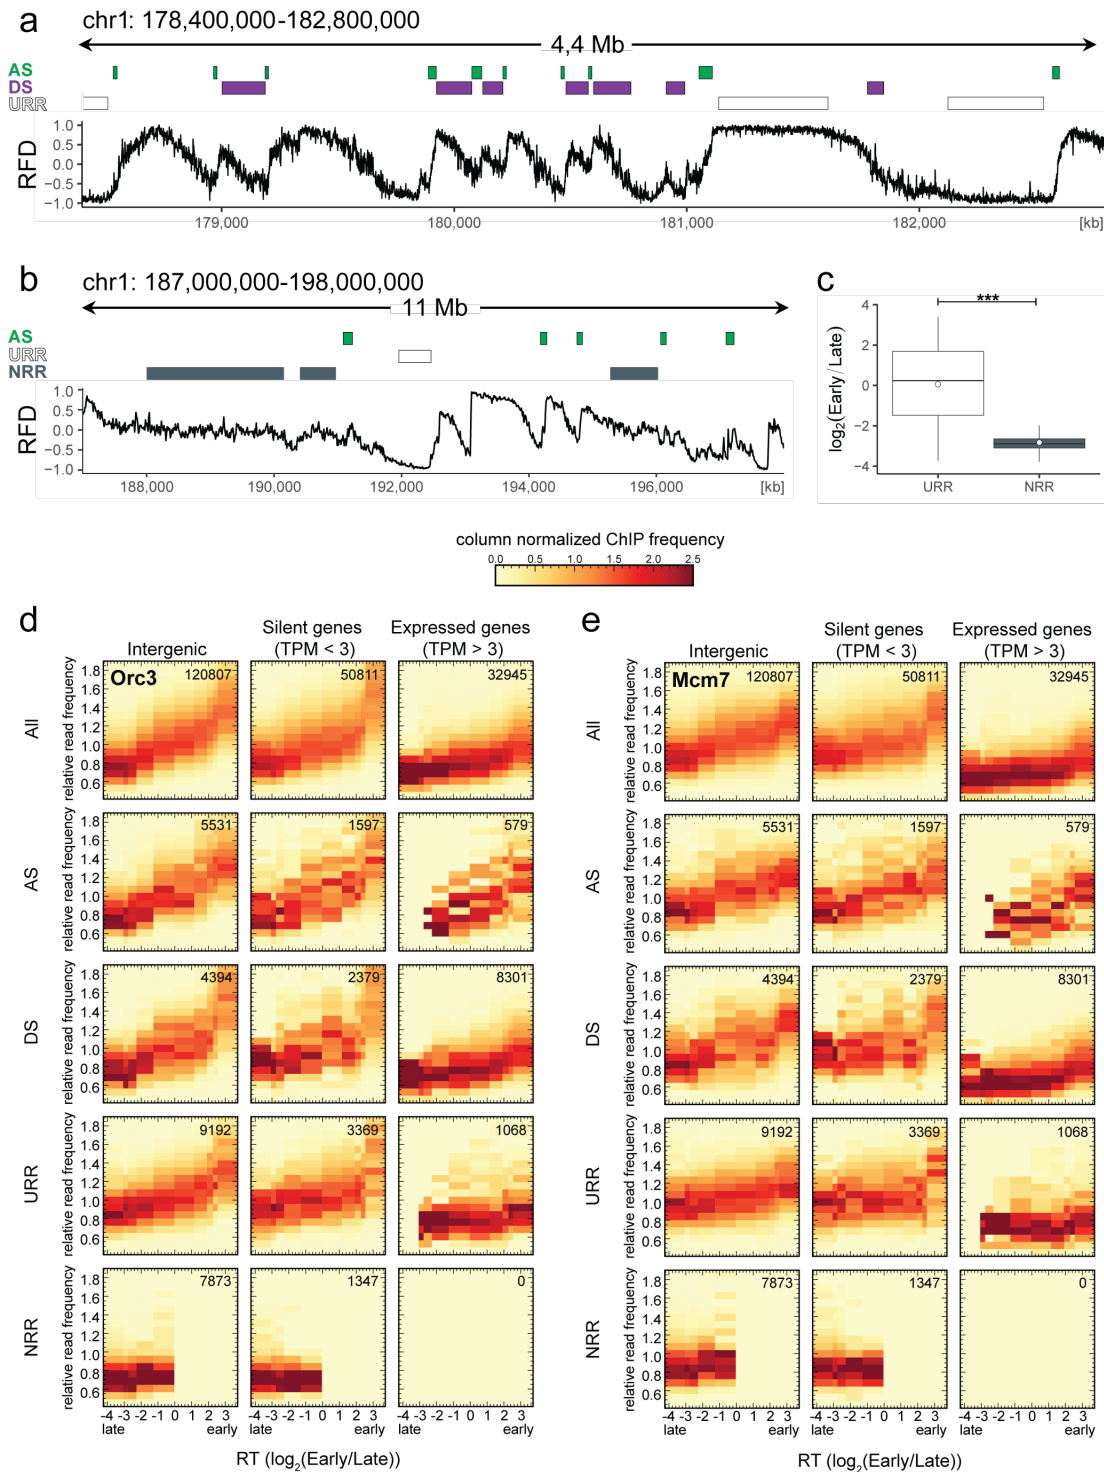

1406

1407 Supplementary Figure 7: ORC/MCM levels are correlated with RT and transcriptional  
1408 activity but otherwise homogeneously distributed along the genome and uncorrelated to RFD  
1409 patterns.

1410 a) Same RFD profile example as Fig. 2a (chr1: 178,400,000 – 182,800,000, covering 4 Mb)  
1411 with indication of AS (green), DS (purple), and URR (white boxes) positions. b) RFD profile  
1412 example on chr1: 187,000,000 – 198,000,000, covering 11 MB, with ASs (green), URRs  
1413 (white boxes), and NRRs (dark gray) indicated. c) Replication timing ratio  $\log_2(\text{Early/Late})$

1414 was assigned to URRs and NRRs and represented as boxplot (mean (circle), the median (thick  
1415 line), the 1st and 3rd quartile (box), the 1st and 9th decile (whiskers), without representing  
1416 outliers). Statistics were performed using one-sided t-test. \*\*\*  $p < 0.001$ . d-e) 3x5 panel of  
1417 2D histograms representing Orc3 (d) and Mcm7 (e) ChIP frequency vs. RT (average  
1418  $\log_2(\text{Early/Late})$  over 100 kb binned according to the decile of RT distribution). The analysis  
1419 was performed in 10 kb windows. ChIP relative read frequencies are normalized by column  
1420 and represent the probability density function of ChIP frequency at a given replication timing.  
1421 The color legend is indicated on top. The columns of each panel represent only windows  
1422 present in intergenic regions (left column), silent genes (TPM < 3, middle column), and  
1423 expressed genes (TPM > 3, right column). TSSs and TTSs proximal regions were not  
1424 considered (see Material and Methods). The rows show either all bins (top row), AS bins  
1425 (predominant replication initiation, second row), DS bins (descending segment, predominant  
1426 replication termination, third row), URR bins (unidirectional replication, no initiation, no  
1427 termination, fourth row) and NRR bins (null RFD regions, spatially random initiation and  
1428 termination, bottom row). The number of bins per panel is indicated in each panel. See Fig. 4  
1429 for equivalent Orc2 and Mcm3 data. Refer to Suppl. Fig. 8a for statistical significances.  
1430

1431 **Supplementary Figure 8**

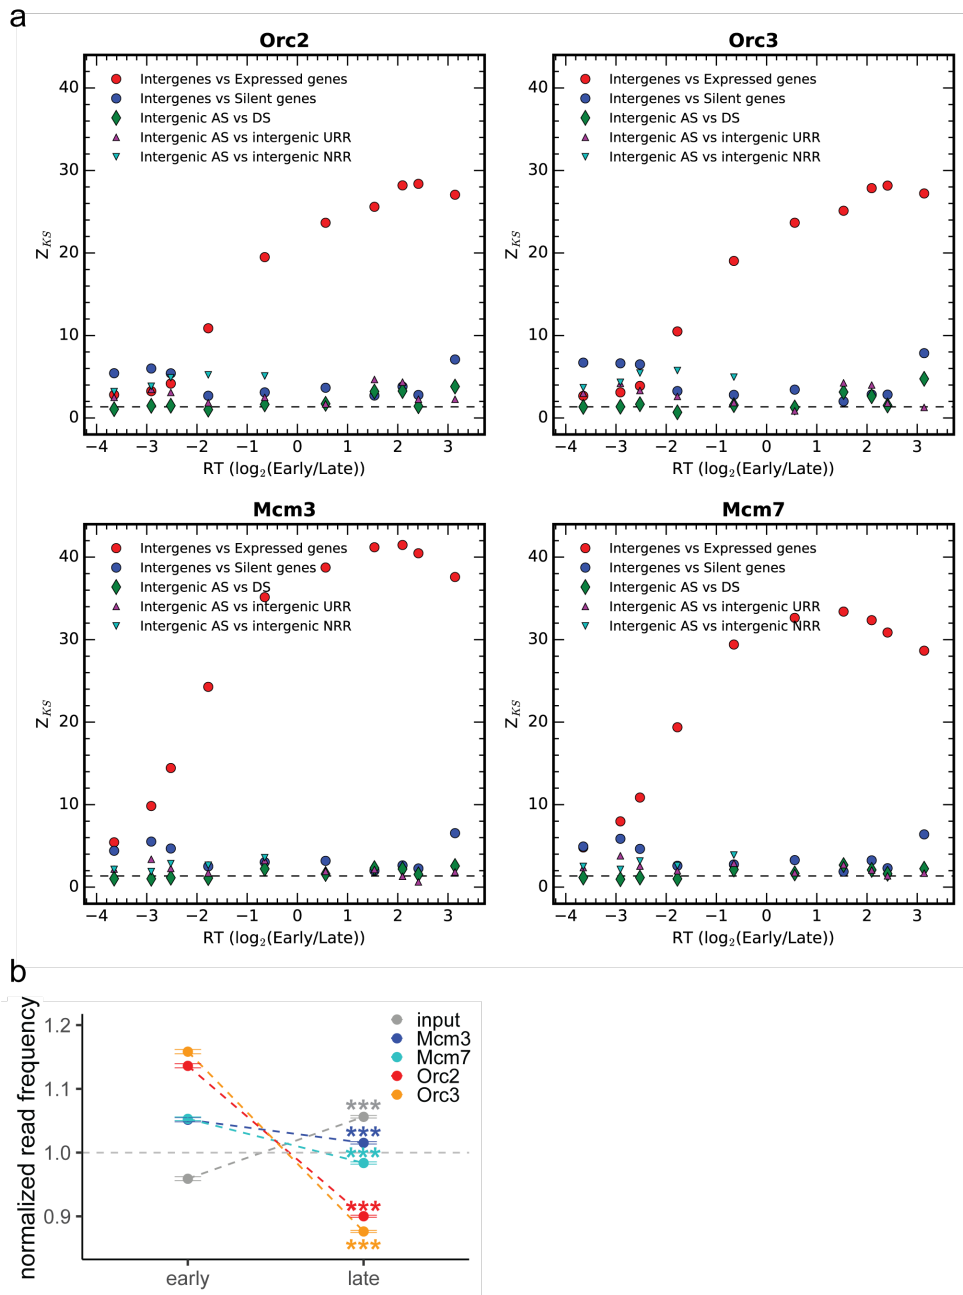

1432

1433 **Supplementary Figure 8:**

1434 a) Kolmogorov–Smirnov statistics between the ORC/MCM relative read frequency  
 1435 distributions in each replication timing bin (shown in Fig. 4 and Suppl. Fig. 7d and 7e) in  
 1436 intergenic vs expressed gene regions (red circles), in intergenic versus silent gene regions  
 1437 (blue circles) and between intergenic regions in AS versus DS (green diamonds), in AS  
 1438 versus URR (magenta triangles pointing up) and in AS versus NRR (cyan triangles pointing  
 1439 down).  $Z_{KS}$  is normalized for sample size. The horizontal dashed lines correspond to p-  
 1440 value = 5%. b) Normalized ORC/MCM/input read frequencies without input division ( $\pm 2 \times$   
 1441 SEM) in early or late RTDs. Early RTDs were defined as  $\log_2(\text{Early/Late}) > 1.6$ ; late RTDs  $<$   
 1442  $-2.0$ . The analysis was performed in 10 kb bins. Any gene  $\pm 10$  kb was removed from the  
 1443 analysis. Statistics were performed using one-sided t-test. \*\*\*  $p < 0.001$ .

1444 **Supplementary Figure 9**

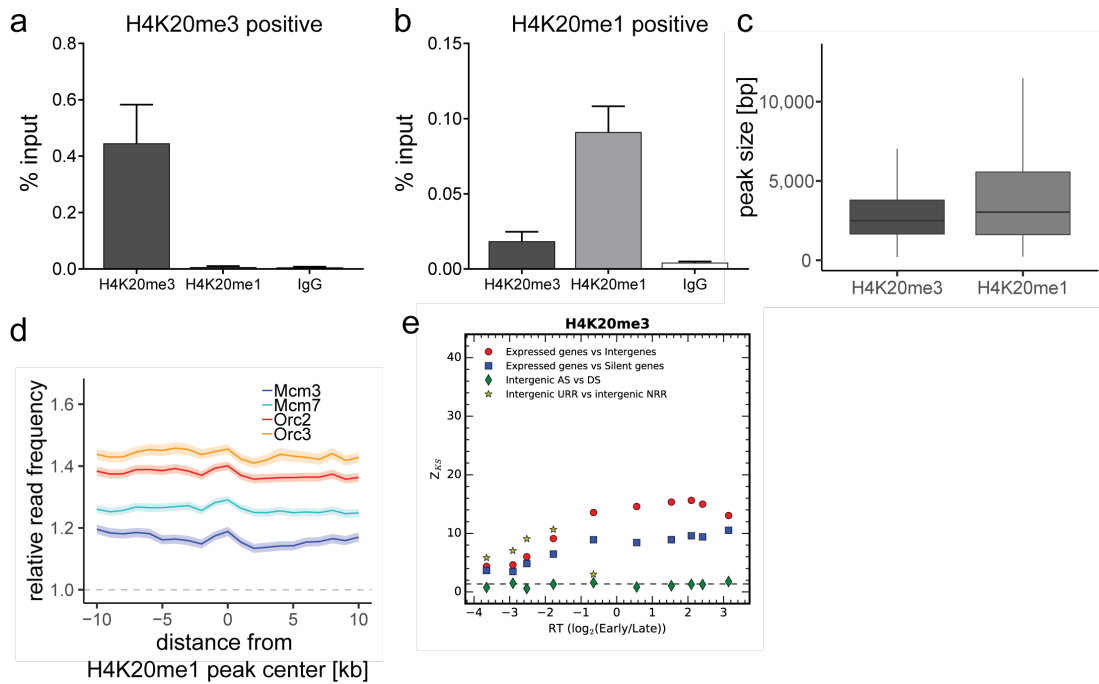

1445

1446 Supplementary Figure 9: ORC/MCM is enriched in late replicating, H4K20me3-high non-  
 1447 genic AS and NRR windows.

1448 a)-b) qPCR validation of H4K20me3 and H4K20me1 enrichment after ChIP at a) an  
 1449 H4K20me3 positive locus and b) an H4K20me1 positive locus. Representation in % input.  
 1450 Isotype IgG antibodies were used as control. c) Boxplot of H4K20me3 and H4K20me1 peak  
 1451 size (in bp) distribution. d) Average ORC/MCM relative read frequencies after input  
 1452 normalization at H4K20me1 peaks (> 1 kb). e) Kolmogorov–Smirnov statistics between the  
 1453 H4K20me3 relative read frequency distributions in each replication timing bin (shown in Fig.  
 1454 6a): expressed gene versus intergenic (red circles) and silent gene (blue squares) regions as  
 1455 well as between intergenic regions in AS versus DS (green diamonds) and in URR versus  
 1456 NRR (yellow stars).  $Z_{KS}$  is normalized for sample size. The horizontal dashed lines  
 1457 correspond to  $p$ -value = 5%.

1458

1459 **Supplementary Figure 10**

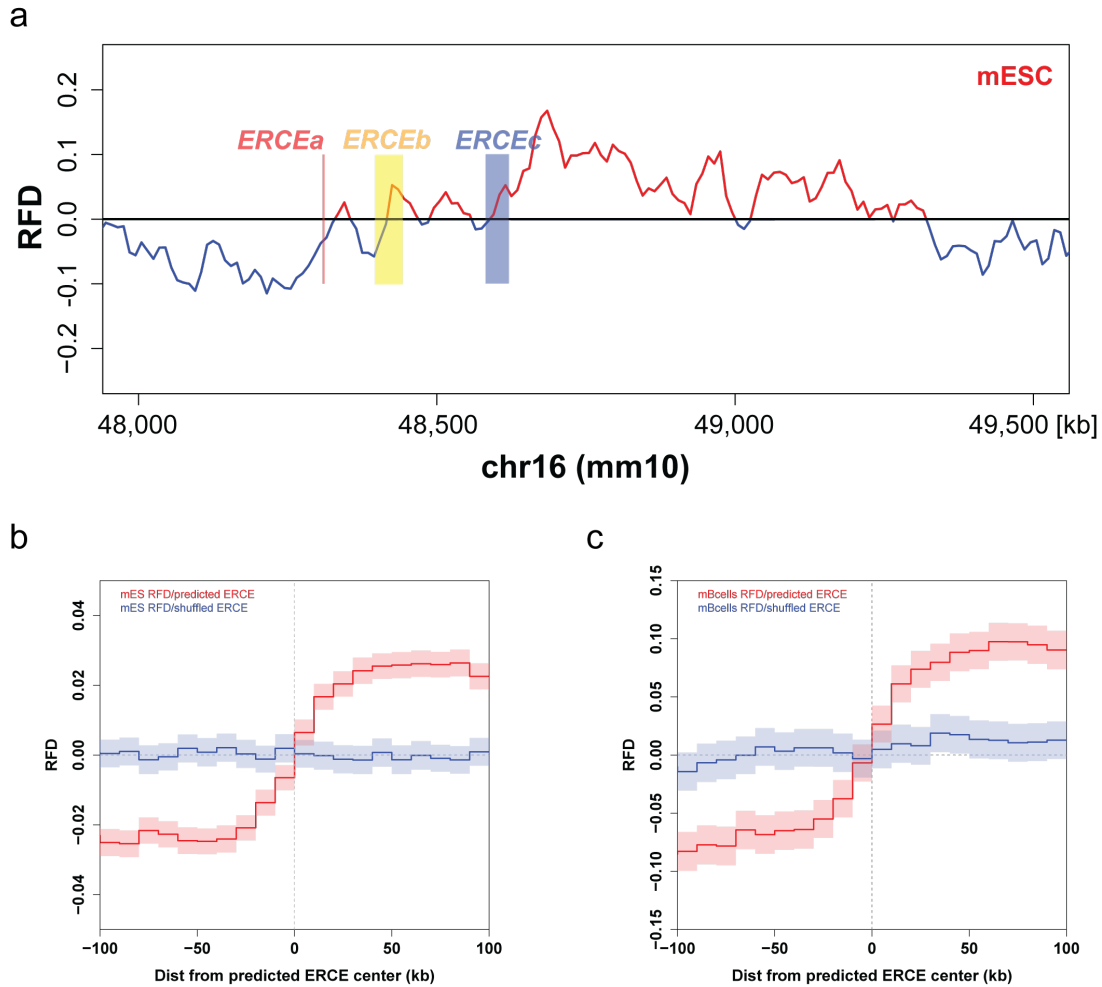

1460

1461 Supplementary Figure 10: Early replication control elements (ERCEs) correlate with  
1462 replication initiation.

1463 a) mESC OK-seq RFD profile of the mouse *Dppa2/4* locus (chr16: 48,000,000 – 49,500,000)  
1464 with indicated ERCEs (ERCEa, ERCEb, ERCEc). ERCEa and ERCEc are located within  
1465 ascending RFD segments (AS) in mESCs. ERCEb encompasses an entire AS. b) Mean mESC  
1466 OK-seq RFD profile around the 1,835 mESC ERCEs predicted by (Sima et al., 2019) (red),  
1467 and randomly shuffled ERCEs (blue). c) Mean mouse primary B-cell OK-seq RFD profile  
1468 around the same mESC ERCE set (red) and randomly shuffled ERCEs (blue). mESC OK-seq  
1469 data was obtained from (Petryk et al., 2018); mouse primary B cell OK-seq data was  
1470 computed from Tubbs et al., 2018; mESC ERCEs were predicted by (Sima et al., 2019).



1471 **Supplementary Table 1:** Proportion of genes significantly depleted from  
1472 ORC/MCM.

1473 A total of 1,941 genes met the criteria of transcriptional activity (TPM > 3), gene size  
1474 larger 30 kb and no adjacent genes within 15 kb. We calculated the proportion of  
1475 genes where the mean relative read frequency within the gene was significantly (p <  
1476 0.05) reduced compared to the upstream region (excluding TSS +/- 3 kb).

1477

|      | Total genes | p < 0.05 | %    |
|------|-------------|----------|------|
| Orc2 |             | 865      | 44.6 |
| Orc3 |             | 850      | 43.8 |
| Mcm3 | 1,941       | 1,460    | 75.2 |
| Mcm7 |             | 1,131    | 58.3 |

1478

1479 **Supplementary Table 2:** Ratio of ChIP mean relative read frequencies in early vs.

1480 late RTDs.

1481 Calculated in 10 kb bins. All annotated genic regions were removed  $\pm$  10 kb.

|      | Mean relative read frequency ratio<br>(early/late) |
|------|----------------------------------------------------|
| Orc2 | 1.40                                               |
| Orc3 | 1.47                                               |
| Mcm3 | 1.15                                               |
| Mcm7 | 1.19                                               |

1482

1483

1484

1485 **Supplementary Table 3:** Characterization of H4K20me3 and H4K20me1 peaks

1486 determined by MACS2 broad peak calling.

1487

|          | Number of peaks<br>(peaks > 1 kb) | Mean peak size<br>[kb] | Peak size range<br>[kb] |
|----------|-----------------------------------|------------------------|-------------------------|
| H4K20me3 | 16,852 (12,251)                   | 3.5                    | 0.2-105.1               |
| H4K20me1 | 12,264 (6,277)                    | 5.5                    | 0.2-182.5               |

1488

1489
